# Supplementary material for: Ice shelf calving due to shear stresses: observing the response of Brunt Ice Shelf and Halloween Crack to iceberg calving using ICESat-2 laser altimetry, satellite imagery, and ice flow models
Source: Copernicus journal article supplement (doi:10.5194/tc-19-4303-2025), 2025-10-06
Supplement: Supplementary file 1 [file tc-19-4303-2025-supplement.pdf]

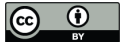

*Supplement of*

**Ice shelf calving due to shear stresses: observing the response of Brunt Ice Shelf and Halloween Crack to iceberg calving using ICESat-2 laser altimetry, satellite imagery, and ice flow models**

**Ashley Morris et al.**

*Correspondence to:* Ashley Morris ([richard.ashley.morris@gmail.com](mailto:richard.ashley.morris@gmail.com))

The copyright of individual parts of the supplement might differ from the article licence.

## Introduction

This file contains 5 Supplementary Texts, 23 Supplementary Figures and 9 Supplementary Tables. Supplementary texts S1 to S3 give further details on the rift detection and measurement workflow described in Sect. 3.1. Text S1 gives additional details of filtering applied to minimize erroneous rift wall detections, Text S2 describes the assignment of a confidence level to individual rift measurements, of particular relevance where the rift is bisected by an ice block and two measurements must be combined to calculate an “opening width” (see also Fig. S5). The combining of bisected rift measurements is discussed in Text S3. Text S4 discusses the production of a Digital Elevation Model (DEM) of Brunt Ice Shelf (BIS) using SlideRule ICESat-2 data. Text S5 discusses the *icepack* finite element ice flow modeling.

Fig. S1 shows the surface velocity field of BIS and the grounded ice immediately upstream in 2015, prior to the initiation of Halloween Crack (HC) (velocity data generated using auto-RIFT (Gardner et al., 2018) and provided by the NASA MEASURES ITS\_LIVE project (Gardner et al., 2020)). The pinning point at McDonald Ice Rumples (MIR) can be seen to exert a strong control on ice shelf flow in the vicinity of the tips of Chasm 1, HC and North Rift (NR). The flow field can be seen to be discontinuous across Chasm 1, reflecting the widening of this rift. The locations of the four Global Navigation Satellite Systems (GNSS) receivers are shown, together with their flow velocity, and the rift-perpendicular component of flow velocity. The rift-perpendicular flow velocities are used to calculate ice flow divergence between the two receivers of each GNSS pair, and subtracted from the rift-perpendicular separation distance time series, providing a better approximation of the HC opening rate that would be measured by GNSS receivers placed close to the rift walls. This is compared to rift widths from ICESat-2 and digitized satellite imagery in Figs. 5, 6 and 7.

Fig. S2 provides additional detail to Fig. 3 in the main manuscript, showing the propagation and opening of Chasm 1 leading to the calving of iceberg A-81 (Marsh et al., 2024; British Antarctic Survey Press Office, 2023; U. S. National Ice Center, 2023) and the accumulation of damage around MIR following calving from NR.

Fig. S3 shows HC digitized on a Landsat-8 OLI image from 2020-02-20 (Landsat image courtesy U.S. Geological Survey), the location of the four GNSS receivers used in this study as of 2018-02-15 (and an additional unused GNSS receiver), and the center of the nadir beam pair of the 17 ICESat-2 reference ground tracks (RGTs) which yield HC width estimates (see Table 1).

Fig. S4 shows the movement of the GNSS receivers, and alignment and location of the RGTs, justifying the selection of those used. RGT 215 1LR and RGT 1160 3LR are approximately aligned with the western GNSS pair; RGT 786 2LR is oblique to the western GNSS pair, but measures a similar part of the rift; RGT 283 1LR and RGT 725 3LR are approximately aligned with the eastern GNSS pair; RGT 1099 2LR is oblique.

It can be seen in Fig. S4 that the western and eastern ends of HC differ in their characteristics. In the west the rift is wider and generally straight, with occasional large (semi-)detached ice blocks bisecting it (Fig. S5). In the east the rift is not as wide and exhibits a degree of meandering. Thus, width estimates from ICESat-2 or digitization of WorldView-1-3/Landsat-8 satellite images corrected for large-scale ( $\sim 10$  km) rift orientation are accurate in the west (Fig. 5), but are prone to overestimation in the east where the RGT occasionally aligns with a small-scale ( $\sim 1$  km) meanders (Fig. 6).

Fig. S5 shows the division of the rift by a large detached ice block, manifesting in the ICESat-2 ATL06 data as two separate troughs. Fig. S6 shows the origin of these isolated blocks and icebergs through the rift initiation and widening processes, and demonstrates why, when the blocks remain largely *in situ*, the “opening width” is the appropriate measurement to use in comparing rift width measurements from ICESat-2, Landsat-8 and WorldView-1-3 satellite imagery with GNSS receiver separation for the purpose of ICESat-2 rift width measurement algorithm validation in Figs. 5 and 6. Tables S3 and S6 record both “opening width” and “wall-to-wall” width. Fig. S7 shows how small-scale meanders can lead to overestimation of rift width. Underestimation could also occur in meandering areas of the rift due to shear.

The ICESat-2 measurements used in Figs. 5 and 6 are shown in Figs. S8 to S15. Figs. S8 and S9 show detections along RGT 215 1LR, Fig. S10 along RGT 1160 3LR, Figs. S11 and S12, along RGT 786 2LR, Fig. S13 along RGT 283 1LR, Fig. S14 along RGT 725 3LR, and Fig. S15 along RGT 1099 2LR. High confidence detections are shown in light red, five lower confidence detections (light orange) of small parts of the rift separated from the main rift by (semi-)detached ice blocks, and combined with the high confidence detections to calculate the “opening width” are shown in Figs. S10i, S10j, S12c, S12i and S13a. Width measurements along RGT 215 1LR on 2019-07-12 (Fig. S8d–f), along RGT 1160 3LR on 2018-12-13 (Fig. S10b–c), along RGT 786 2LR on 2018-11-19 and 2019-02-17 (Fig. S11a–f), along RGT 283 1LR on 2018-10-17 (Fig. S13a–c), along RGT 725 3LR on 2018-11-15 (Fig. S14a–c), and along RGT 1099 2LR on 2019-03-10 (Fig. S15a–c)

were not used in Figs. 5 and 6 due to satellite pointing errors.

50 The ICESat-2 rift width/opening rate measurements - and by extension the rift measurement algorithm - are validated using digitized rift width measurements using satellite imagery and the divergence-corrected separation of two pairs of GNSS receivers (Figs. 5, 6, 7). Whilst the ICESat-2 RGTs along which rift width is measured using ICESat-2 and digitized satellite imagery are fixed in space (Eulerian frame of reference), HC and the GNSS receivers are moving with ice flow (Figs. 1 and S1) largely east to west. The rift parallel (and approximately ICESat-2-RGT-perpendicular) component of velocity near the  
55 GNSS pair baselines varies from  $\sim 700$  to  $\sim 1000 \text{ m a}^{-1}$  depending on location and time (as ice flow accelerates following calving from NR), according to the modeled velocity fields. Fig. S16 shows modeled HC opening rate ( $\text{m a}^{-1}$ ) with different flow law parameters and assumptions on location of maximum opening. It shows the difference in opening rate for locations approximating the western and eastern GNSS pair baselines, and points 1 km upstream, showing the potential effect of ice flow on the comparison between the three independent rift width measurement datasets. In all cases the opening rate 1 km upstream is within  $10 \text{ m a}^{-1}$  of that at the GNSS locations. It therefore does not qualitatively effect our comparison of the three datasets. However, we note that the difference can become important closer to the rift tip(s), over long time periods, or where the displacement of ice perpendicular to the ICESat-2 RGTs over the period under consideration is a significant proportion of the rift length.

Fig. S17 shows the ice thickness (a–c) and ice velocity (g–i) inputs to the *icepack* ice flow model runs for “pre-calving”,  
65 “propagation” and “post-calving” periods. The thickness DEM is explained in more detail in Text S4. The feature-tracking workflow within ESA’s SeNtinel Application Platform (SNAP) was applied to pairs of Sentinel-1 SAR scenes to create the velocity maps. The change in feature-tracked flow speed and direction between the “pre-calving” period and the “propagation” and “post-calving” periods is shown in h and i insets, j and k. Fig. S18 shows modeled ice velocity (a–c) and modeled fluidity parameter (f–h) outputs from the inverse model runs for the three periods, and ice flow acceleration (d, e) between the “pre-calving” period and the “propagation” and “post-calving” periods. Fig. S19 shows the change in modeled fluidity between the difference periods (a,b), as well as close ups on the modeled velocity vectors in the vicinity of MIR (c–e), showing the degree of contact between the ice shelf and the pinning point, to be used to aid interpretation of Fig. 8 in the main manuscript.

Figs. S20, S21, S22 and S23 show ICESat-2 elevation along RGTs which cross the calving fronts prior to and following calving from NR. We do not observe large and consistent changes in calving front freeboard (and hence ice thickness) which could  
75 explain the change in HC opening rate observed.

Tables S1, S2 and S5 identify the WorldView-1-3, Landsat-8 and Landsat-9 satellite images on which HC width was measured. Measurements shown are aligned with RGTs, and are corrected for the obliquity of the RGT to the rift-perpendicular plane prior to comparison with measurements from ICESat-2 and GNSS receiver separation distances in Figs. 5 and 6. Tables S3 and S6 show the “opening width” and where applicable also the “wall-to-wall” width from WorldView-1-3 and Landsat-8 imagery  
80 respectively, for RGT 215 1LR, RGT 1160 3LR and RGT 786 2LR used in Fig. 5. Tables S4 and S7 show the corresponding values for RGT 283 1LR, RGT 725 3LR and RGT 1099 2LR used in Fig. 6.

Table S8 lists the Sentinel-1 SAR and Sentinel-2 and Landsat-8 optical images used in the *icepack* inverse modeling shown in Fig. 8. A feature tracking algorithm is used to extract ice flow fields from pairs of Sentinel-1 SAR images using the SeNtinel Application Platform (SNAP). Sentinel-2 and Landsat-8 optical images are used to define the model domain. Table S9 presents  
85 the rates of HC opening for areas between the western and eastern GNSS pairs from inverse model runs for the “pre-calving”, “propagation” and “post-calving” periods, and diagnostic model runs using modeled velocity, “pre-calving” modeled fluidity and “propagation” and “post-calving” geometry (Text S5). The model runs were conducted with ice temperatures of 253 K and 260 K.

## 90 S1. Filtering

A number of filters and thresholds were applied throughout the rift detection and measurement workflow to maximise the reliability of the rift width measurements. Each beam from each satellite pass was processed independently. Prior to rift detection and measurement, any  $\sim 4$  km sections with  $>20$  % of elevations flagged as low quality were discarded. Further, any unrealistic elevations ( $>100$  m) were discarded whether flagged as low quality or not. Any beams with  $>3$  % of gaps between elevation  
95 measurements exceeding 25 m were discarded. Rift detections were only processed if  $<25$  % of elevations within the expanded search area around the lowest point were flagged as low quality (Fig. 4b). If the mean separation of elevations within each selected rift wall exceeded 50 m or there were fewer than three elevation measurements, the rift measurement was skipped. Rift width measurements from early satellite passes with substantial pointing errors (Figs. S8d–f, S10a–c, S11a–f, S13a–c, S14a–c, S15a–c) were not used for the validation against rift width measurements from optical satellite data and the separation  
100 of GNSS receivers.



## S2. Confidence

Rift detections were assigned a confidence level of “high”, “medium” or “low”. A potential rift was defined as any ATL06 points below 50 % of a 10 km smoothed surface. For each potential rift detection, the algorithm defined an extended search window centered on the lowest elevation point. If the elevations either side of the lowest point exceeded 80 % of the elevation of the smoothed surface, the detection was assigned a “high” confidence. If elevations on either or both sides of the rift were between 50 % and 80 % of the elevation of the smoothed surface, the detection was assigned a “medium” confidence. In the case of “high” and “medium” confidence detections, the steepest slopes were found and width measured as described in Sect. 3.1. If neither threshold was satisfied, the detection was assigned a “low” confidence, and the width was defined as the extent of the ATL06 points below the 50 % of running mean threshold used for initial rift detection. Measurements based on “medium” and “low” confidence detections were discarded unless they were merged with a “high” confidence detection where the rift was bisected by an iceberg or semi-detached ice block. This ensured that rift width measurements were primarily based on “high” confidence detections, but that the rift width was not frequently underestimated as a result of discarding measurements of “medium” or “low” confidence detections of generally narrow sections of the rift near the point of attachment of an ice block or recent detachment of an iceberg (Figs. S10h–i and j–k, S12b–c and h–i).

115 **S3. Merging**

Large icebergs or semi-detached ice blocks held in place by ice mélange occur at several locations along HC, originating from the initiation of rifting (Fig. S6). If an ICESat-2 beam passes over one of these *in situ* blocks, the rift is divided into two closely spaced troughs (Figs. S8a–f, S10d–k, S11d–f and j–l, S12a–i, S13a–c). For validation of the rift widths and rift opening rates from ICESat-2 with measurements from GNSS receivers, it is necessary to merge the two measurements to calculate a total “opening width” (Figs. S5 and S6). Any pair of rift measurements on the same date and along the same beam were merged if they were separated by less than a distance limit of 500 m. The “opening width” was calculated as the sum of the individual widths, with the “wall-to-wall” width also calculated as the distance between the most landward and most seaward walls (Fig. S5). This distance limit was found to be sufficient for the current study, where detections of rifts other than HC are discarded (based on a location polygon defined using multi-temporal satellite imagery), and iceberg/block widths are ~100 m. More advanced merging tools may be required for other ice shelves based on rift separation distance and iceberg/block size. Medium or low confidence rift measurements (Text S2) were often narrow rift sections near the point of attachment of an ice block to the rift wall, or the point of recent detachment of an iceberg (Figs. S10h–i and j–k, S12b–c and h–i). These were combined with neighboring high confidence measurements as described above. Where no high confidence measurement existed within the distance limit, the rift observation was discarded (i.e. no “opening width” measurement was a combination of two medium or low confidence measurements, and medium or low confidence measurements which were not combined with a high confidence measurement were discarded).

#### S4. Digital elevation model

The *icepack* model requires an ice shelf thickness DEM covering the entire domain. Prior to the 2021 calving from NR, BIS was advancing, and thus freely available ice shelf freeboard or thickness datasets with timestamps prior to the period of interest (2020–2021) do not cover the entire domain. We therefore used ICESat-2 data to create a new thickness DEM. We used SlideRule (Swinski et al., 2022) to obtain elevation estimates derived from ICESat-2 data during the period 2020-01-01 and 2021-02-01 (immediately prior to NR calving). These were interpolated onto a regular grid, and converted to freeboard using the EGM2008 geoid model (Pavlis et al., 2012) and a mean dynamic topography estimate of -1.7 m (Andersen and Knudsen, 2009). We then extrapolated the BedMachine Antarctica (Morlighem, 2020) firm air content field to cover the domain, and subtracted it from the freeboard. Finally, we converted freeboard to thickness using an ice density of  $900 \text{ kg m}^{-3}$  and sea water density of  $1027 \text{ kg m}^{-3}$ . The same thickness model is used for the “pre-calving”, “propagation” and “post-calving” model runs, cropping to the appropriate domain to simulate the calving of the iceberg from NR. We varied the thickness by  $\pm \sim 20 \text{ m}$  and repeated some model runs to test the impact of thickness uncertainty, finding little change in the modeled rate of HC opening. To ensure a sensible estimation of driving stress, it was necessary to smooth the DEM prior to use in the modeling. We created a smoothed DEM within *icepack* by minimising the functional:

$$J(h) = \frac{1}{2} \int_{\Omega} ((h - h_{obs})^2 + \alpha^2 |\nabla h|^2) dx \quad (\text{S1})$$

where  $h$  is the smoothed thickness map,  $h_{obs}$  is the observed (unsmoothed) thickness map, and  $\alpha$  is the length scale over which we want to penalise large oscillations 2 km (Shapero et al., 2021). The first term quantifies the mismatch between observed (unsmoothed) and smoothed thickness maps, while the second quantifies oscillation within the thickness map.

## 150 S5. Ice flow model

We conducted inverse model runs using the Python-based finite element glacier and ice sheet flow modeling library *icepack*; an annotated notebook of the application of an inverse model to Larsen D Ice Shelf can be found at [icepack.github.io/notebooks/tutorials/05-ice-shelf-inverse](https://icepack.github.io/notebooks/tutorials/05-ice-shelf-inverse) (Shapero et al., 2021). For completeness we will recapitulate the main steps here. An inverse model is used to estimate the fluidity parameter  $A$  in Eq. 1 in the main manuscript, Eq. S6 here (Glen’s flow law) from  
 155 observed ice velocity and thickness data. We wish to find a modeled fluidity field which results in the modeled velocity field ( $u_{model}$ ) which minimises the offset to the observed velocity field ( $u_{obs}$ ):

$$E(u) = \frac{1}{2} \int_{\Omega} \left( \frac{u_{model} - u_{obs}}{\sigma} \right)^2 dx \quad (S2)$$

Where  $\sigma$  are measurement standard deviations. As the fluidity field must be positive,  $A$  is reparameterised as:

$$A = A_0 e^{\theta} \quad (S3)$$

160 As well as minimising the velocity offset, a regularisation function penalises oscillations over a given length scale:

$$R(\theta) = \frac{L^2}{2\Theta^2} \int_{\Omega} |\nabla \theta|^2 dx \quad (S4)$$

Where  $\Theta$  is the size of the oscillation and  $L$  is the length scale. The physics constraint for the problem is that  $F(u, \theta) = 0$  (where  $F(u, \theta)$  is a weak form of the shallow shelf equations). The combined objective functional is:

$$J(u_{model}, \theta; \lambda) = E(u) + R(\theta) + \langle F(u_{model}, \theta), \lambda \rangle \quad (S5)$$

165 Where  $\lambda$  is the Lagrange multiplier. The model calculates the derivative of this functional with respect to  $\theta$  using the adjoint method, and uses a descent method to iterate towards a critical point which is below the thresholds for the magnitude or gradient of the objective functional (or maximum number of iterations), which gives a value of the fluidity coefficient which is close to reality (Shapero et al., 2021).

We conducted *icepack* model runs to replicate the “pre-calving”, immediately post-calving (“propagation”) and “post-  
 170 calving” fluidity and velocity fields of Brunt Ice Shelf, as well as additional inverse model runs to investigate the importance of changes in geometry, velocity, and fluidity. These model runs are labeled “Diagnostic<sub>1</sub>” to “Diagnostic<sub>9</sub>” in Table S9, and were run with ice temperatures of 253 K and 260 K. Modeled velocity (used to define ice flow into the model domains across the grounding zone, divide between BIS and SWIT, and from MIR) and fluidity field outputs from the inverse model runs were resampled onto regular grids and the *fill* tool in QGIS used to interpolate across rifts and extrapolate beyond the calving front.  
 175 This allowed fields to be used interchangeably regardless of the advection of rifts with ice flow, or changes in calving front position. “Diagnostic<sub>1</sub>” is a repeat of the “pre-calving” inverse model run to test the impact of resampling and interpolation on HC opening rates. Opening rates were within  $\sim 10 \text{ m a}^{-1}$  of the rates from the inverse model run except for the western GNSS pair at 253 K where the rate was overestimated by  $\sim 30 \text{ m a}^{-1}$ . For model runs “Diagnostic<sub>2</sub>” to “Diagnostic<sub>5</sub>” ice flow into the domain and the ice shelf fluidity were kept constant and the geometry was changed to “propagation” and “post-calving”  
 180 geometries, with HC either in its “pre-calving” geometry (to negate the potential impact of fluidity field interpolation across the rift) or in its corresponding “propagation”/“post-calving” geometry. In all cases the modeled HC opening rate remained close to “pre-calving” rate, in contrast to the observations from ICESat-2, satellite imagery, and GNSS receiver separation, and the “propagation” and “post-calving” inverse model runs. This shows that additional changes resulting from the geometry change are necessary to explain the observed pattern of HC opening. For model runs “Diagnostic<sub>6</sub>” to “Diagnostic<sub>9</sub>” only  
 185 the “pre-calving” modeled fluidity was held constant. “Propagation” and “post-calving” ice shelf geometries were used, and runs repeated with the HC in the corresponding geometry or “pre-calving” geometry as discussed above. “Propagation” and “post-calving” modeled velocity was used as input at the domain boundaries. In these model runs the observed pattern of a decrease of HC opening rate approaching stagnation immediately after calving, before a return to opening is replicated, though

with some offsets between the results from the inverse and “Diagnostic” model runs, particularly in the “post-calving” period.  
 190 This may be due to uncertainties introduced by the resampling and interpolation, though may also reflect the impact of changes  
 in the fluidity field of the wider ice shelf (which likely show the opening of fractures close to the grounding zone). We therefore  
 conclude that the changes in HC opening rate result from changes in BIS geometry following calving from NR, and the result-  
 ing reorganisation of ice flow, though additional fracturing, manifesting as increases in fluidity may play a secondary role.  
 We additionally calculate the principal stress orientations and magnitudes during the “pre-calving”, “propagation” and “post-  
 195 calving” periods to assess changes resulting from the calving of iceberg A-74 from NR. Starting from Glen’s flow law (Glen,  
 1955):

$$\dot{\epsilon}_{ij} = A\tau_E^{n-1}\tau_{ij} \quad (S6)$$

where  $n = 3$ ,  $\dot{\epsilon}_{ij}$  and  $\tau_{ij}$  are the strain rate and deviatoric stress tensors, and  $\tau_E = \sqrt{\tau_{ij}\tau_{ij}/2}$  is the effective deviatoric stress.  
 Substituting the value of  $n$  the effective deviatoric stress into Eq. S6 gives:

$$200 \quad \dot{\epsilon}_{ij} = A \left( \sqrt{\frac{\tau_{ij}\tau_{ij}}{2}} \right)^{3-1} \tau_{ij} \quad (S7)$$

Which can be simplified to:

$$\dot{\epsilon}_{ij} = A \frac{\tau_{ij}\tau_{ij}}{2} \tau_{ij} \quad (S8)$$

and further to:

$$\dot{\epsilon}_{ij} = \frac{A\tau_{ij}^3}{2} \quad (S9)$$

205 and rearranging for  $\tau_{ij}$  gives:

$$\tau_{ij} = \sqrt[3]{\frac{2\dot{\epsilon}_{ij}}{A}} \quad (S10)$$

allowing calculation of the individual components of the deviatoric stress tensor from the components of the strain rate tensor  
 (calculated from the modelled velocity fields) and fluidity coefficient. From this we can calculate the principal stress orientation  
 $\theta_p$  using:

$$210 \quad \tan(2\theta_p) = \frac{2\tau_{xy}}{\tau_{xx} - \tau_{yy}} \quad (S11)$$

which can be rearranged to:

$$\theta_p = \frac{\tan^{-1}\left(\frac{2\tau_{xy}}{\tau_{xx} - \tau_{yy}}\right)}{2} \quad (S12)$$

The principal stresses  $\tau_{11}$  and  $\tau_{22}$  are given by:

$$\begin{bmatrix} \tau_{11} & \tau_{12} \\ \tau_{21} & \tau_{22} \end{bmatrix} = \begin{bmatrix} \cos(\theta_p) & \sin(\theta_p) \\ -\sin(\theta_p) & \cos(\theta_p) \end{bmatrix} \begin{bmatrix} \tau_{xx} & \tau_{xy} \\ \tau_{yx} & \tau_{yy} \end{bmatrix} \begin{bmatrix} \cos(\theta_p) & -\sin(\theta_p) \\ \sin(\theta_p) & \cos(\theta_p) \end{bmatrix} \quad (S13)$$

215 where  $\tau_{12} = \tau_{21} = 0$

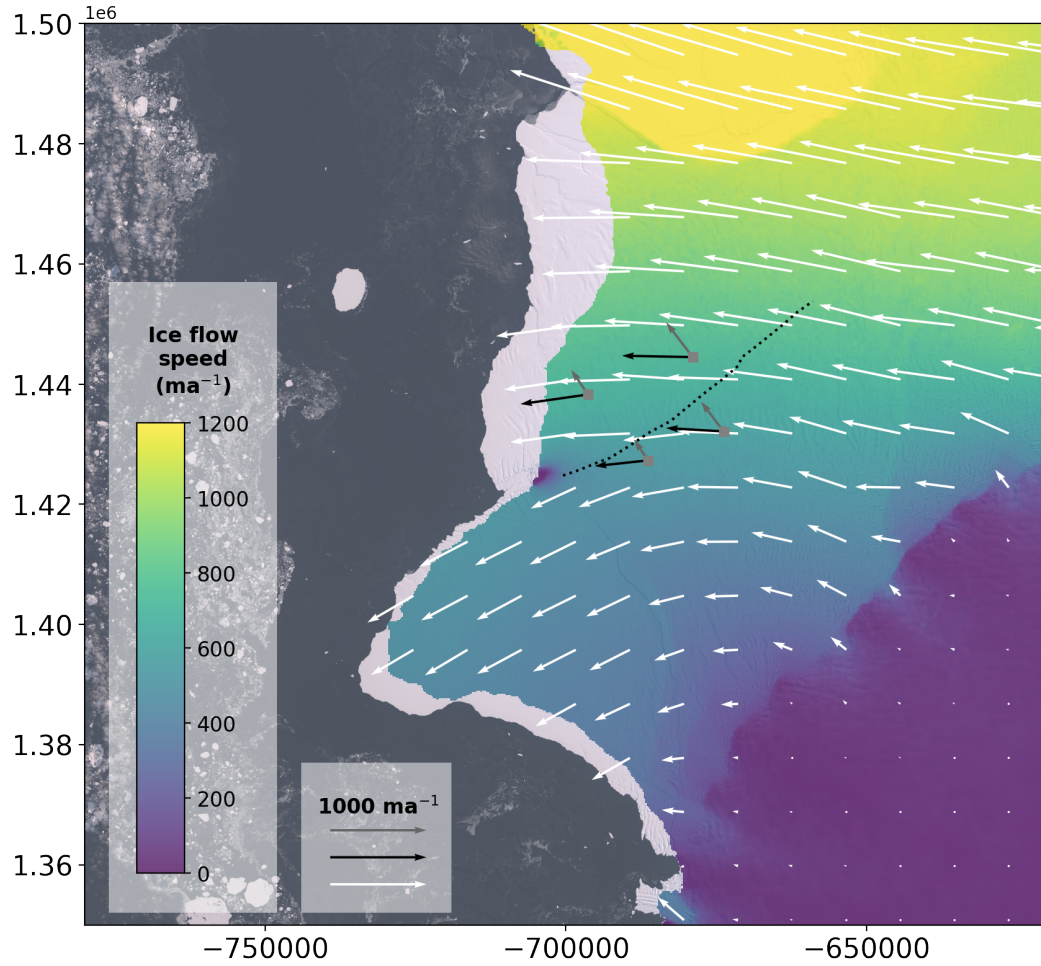

**Figure S1.** Brunt Ice Shelf surface flow speed field in 2015, prior to HC initiation, using velocity data generated using auto-RIFT (Gardner et al., 2018) and provided by the NASA MEaSUREs ITS\_LIVE project (Gardner et al., 2020). Note the impact on the flow field of the pinning point at McDonald Ice Rumples. The black dashed line shows the large-scale axis of HC, gray squares show the mean location of the GNSS receivers, white arrows show the direction and magnitude of ice flow, black arrows show ice flow at the locations of the GNSS receivers, gray arrows show the rift-perpendicular component of ice flow at the locations of the GNSS receivers. The rift-perpendicular components of ice flow were used to remove ice flow divergence from the time series of GNSS receiver pair separation distance used in Figs. 5, 6 and 7. Removing the divergence approximately reconstructs the time series of separation that would be measured by pairs of GNSS receivers close to the walls of HC. Landsat imagery courtesy of U.S. Geological Survey.

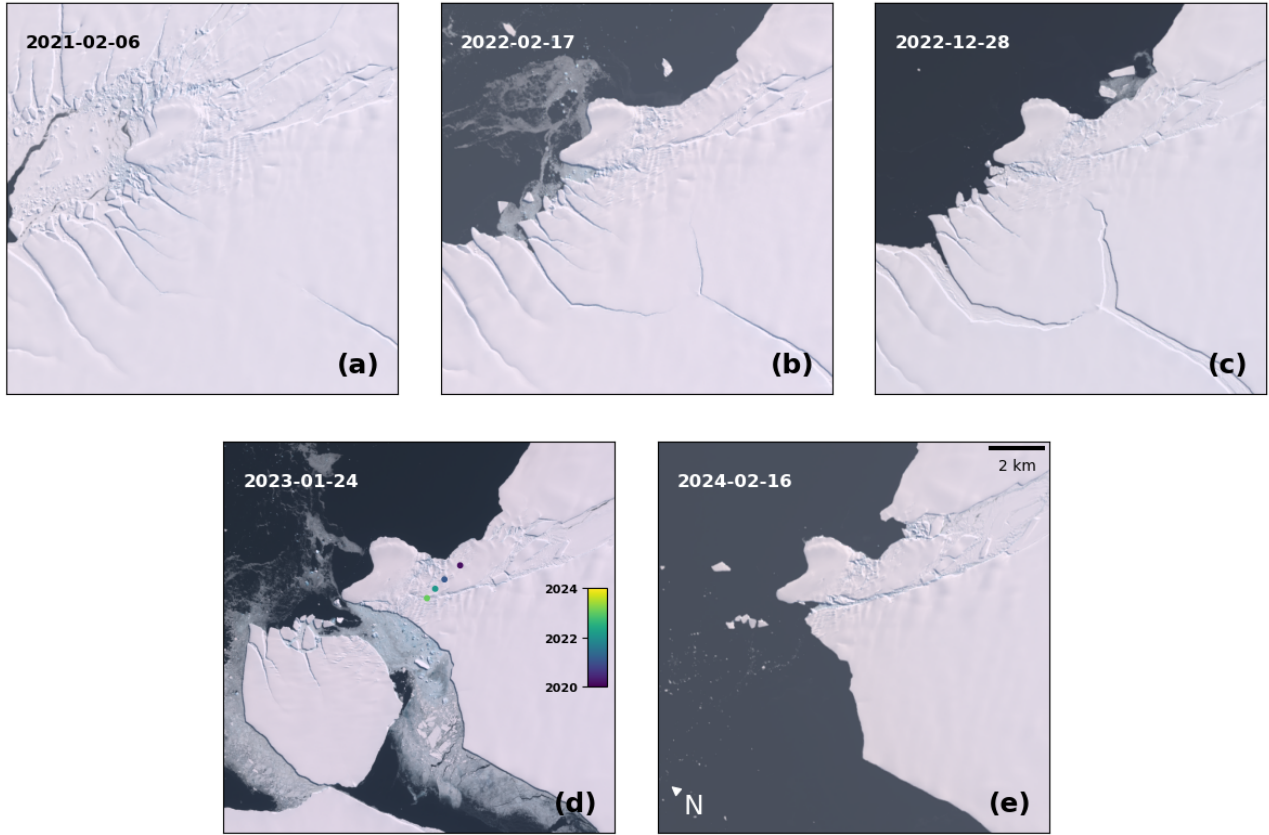

**Figure S2.** Propagation and opening of Chasm 1 leading to the calving of iceberg A-81 and the accumulation of damage around MIR following calving from NR. (a) Prior to calving from NR, the tip of HC was to the east of MIR and the tip of Chasm 1 was to the south. (b, c) Propagation and opening of Chasm 1 and a smaller frontal rift, and the accumulation of damage ~3 km upstream of MIR to the nascent iceberg between HC and the ice front in the period following calving of iceberg A-74 from NR. (d) Calving of iceberg A-81 from Chasm 1 and a smaller fragment from between Chasm 1 and the frontal rift in January 2023. The degree of contact between MIR and BIS in the immediate aftermath of calving remained ~2350 m of which ~1500 m was with the nascent HC iceberg and ~850 m was with the remainder of the shelf. The coloured points show the path of the western tip of HC around the southeast of MIR between 2020 and 2023. (e) Breakthrough of the damaged area of the nascent HC iceberg, and of the western tip of HC to the new western ice front (Marsh et al., 2024). Landsat imagery courtesy of U.S. Geological Survey; Copernicus Sentinel-2 data [2023].

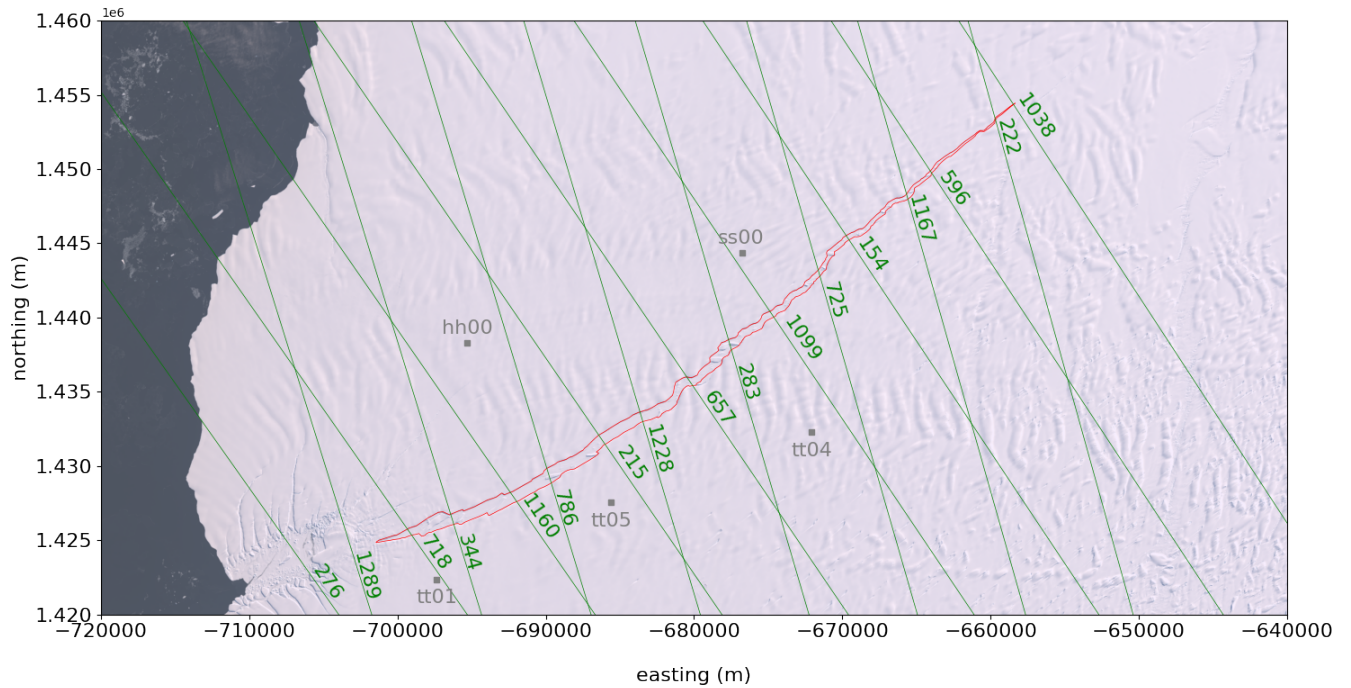

**Figure S3.** Centers of the nadir beam pair of 17 reference ground tracks (green, numbered), along Halloween Crack (red), on a Landsat-8 OLI image from 2020-02-20. Gray squares show the 2018-02-15 locations of the four GNSS receivers used in this study (the “western pair”: hh00 and tt05, and the “eastern pair”: ss00 and tt04) and unused GNSS receiver tt01. Landsat imagery courtesy of U.S. Geological Survey.



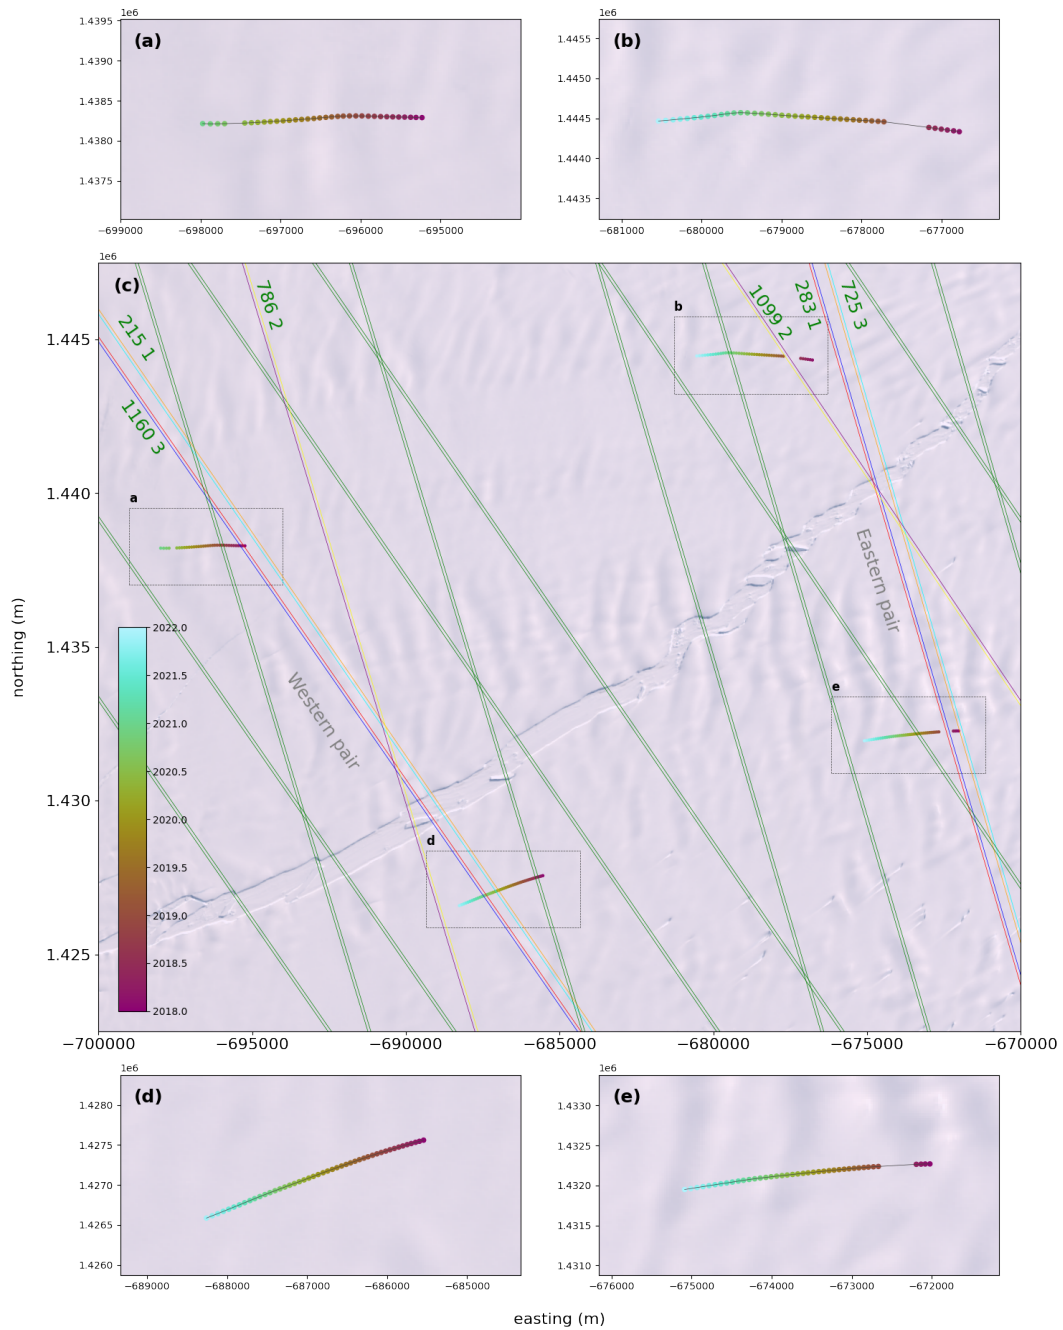

**Figure S4.** Movement of the GNSS receivers with ice flow. The six RGT beam pairs (RGT 215 1LR, RGT 1160 3LR, RGT 786 2LR, RGT 283 1LR, RGT 725 3LR, RGT 1099 2LR) used for comparison with rift-perpendicular opening rates between pairs of GNSS receivers are shown, colors correspond to Figs. 1, 5, 6 and 7. Landsat imagery courtesy of U.S. Geological Survey.

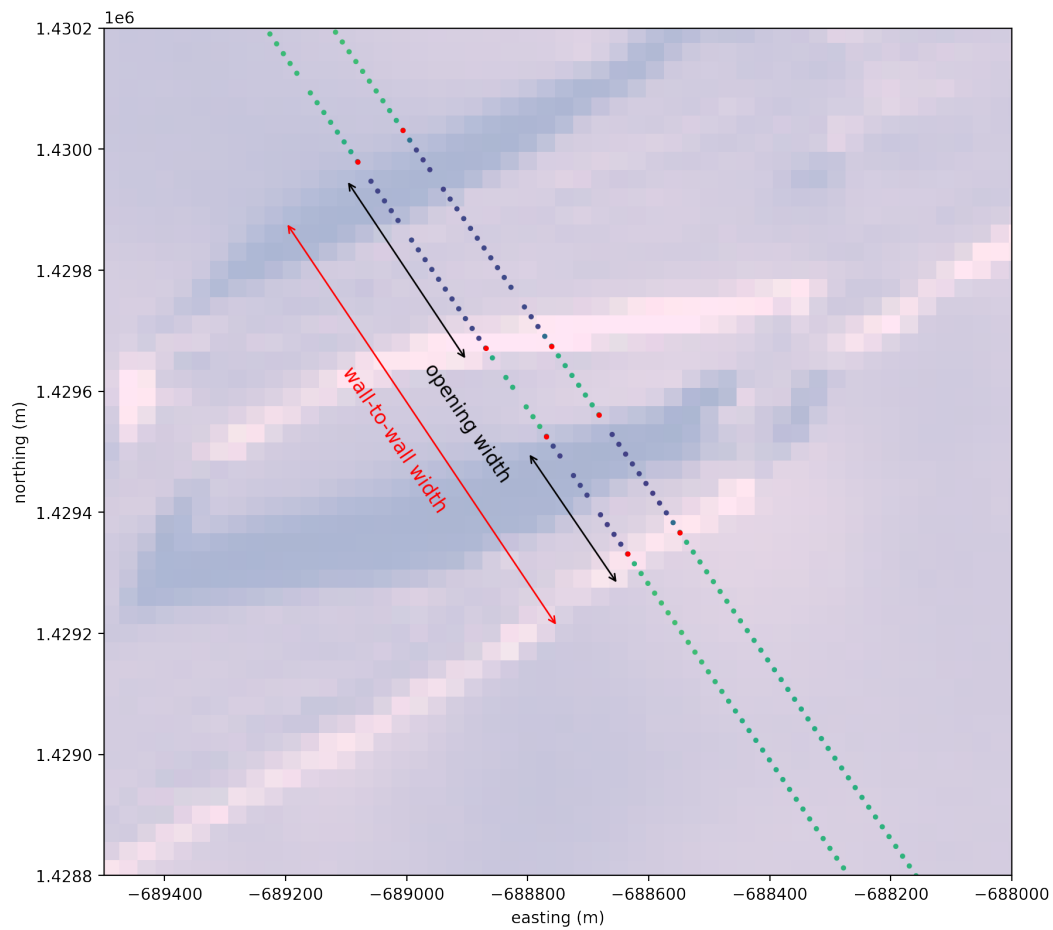

**Figure S5.** Rift “opening width” (the distance the rift has opened, ignoring the iceberg within the rift) and “wall-to-wall width” (the total distance between the seaward and landward rift walls) on a Landsat-8 image from 2019-04-12 (Landsat imagery courtesy of U.S. Geological Survey).

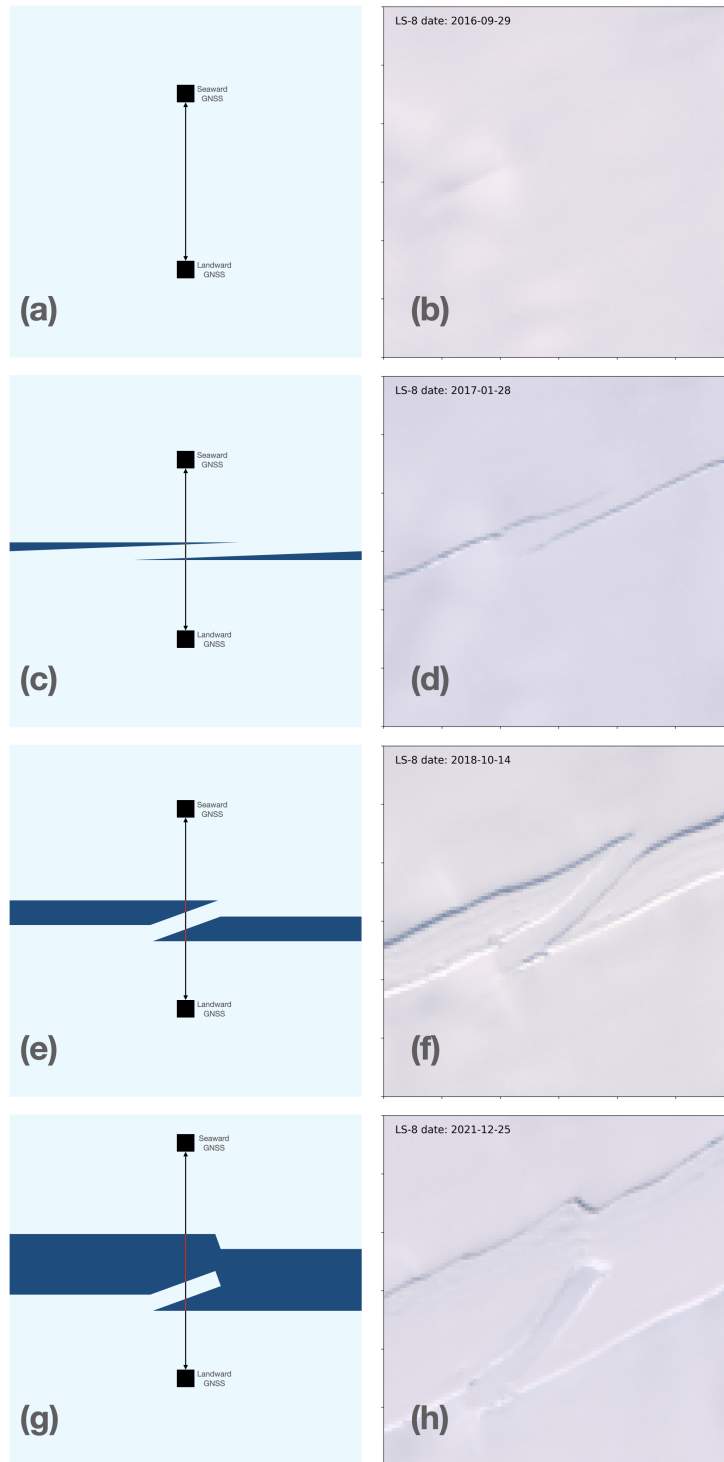

**Figure S6.** Schematic demonstrating why “opening width” (red) is the appropriate width to use when comparing widths from ICESat-2 and satellite imagery with GNSS receiver separation. Landsat imagery courtesy of U.S. Geological Survey.

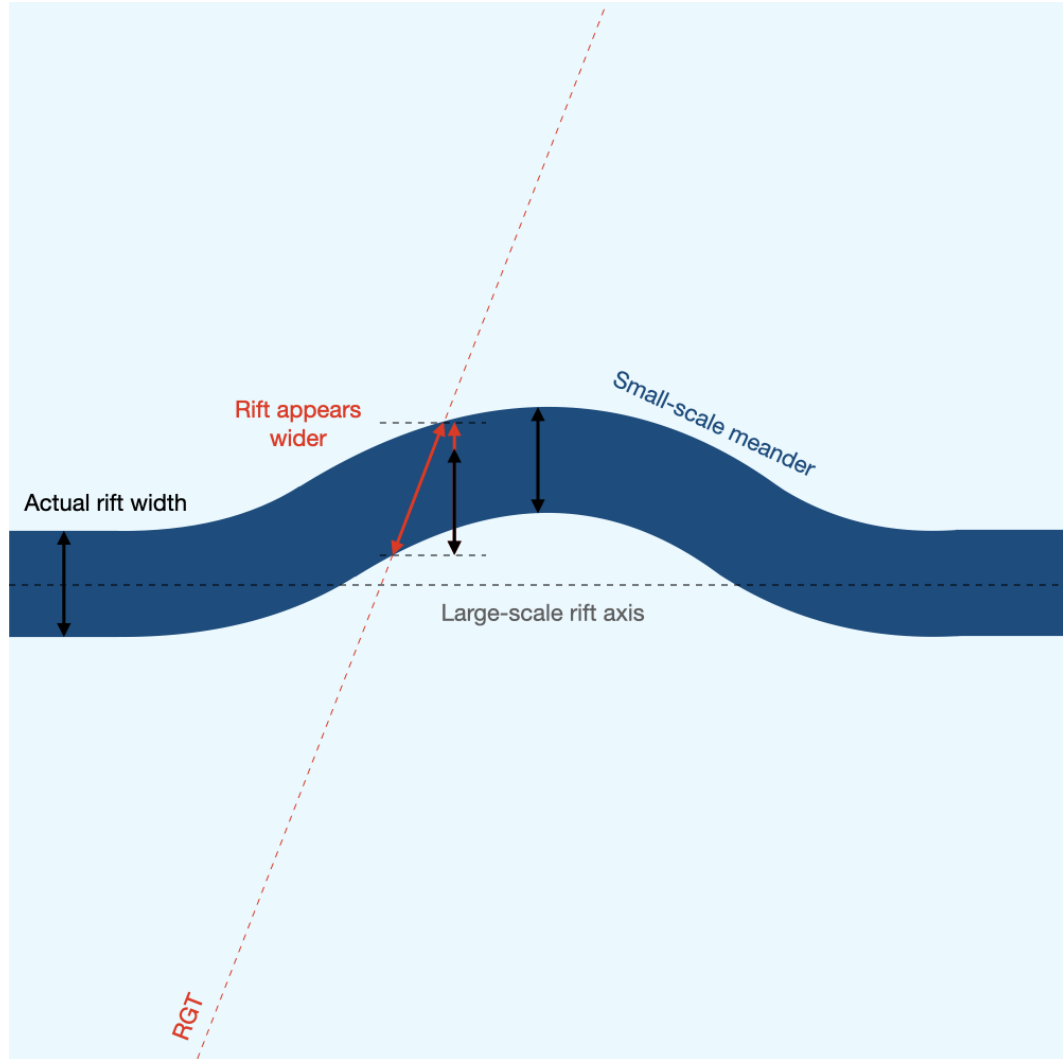

**Figure S7.** Schematic demonstrating the effect of small-scale meanders, caused by rift propagation between meteoric ice blocks (De Rydt et al., 2018; King et al., 2018), on rift width measurement. This is the situation for HC between the eastern pair of GNSS receivers, and may account for the occasional overestimation of rift width in Fig. 6. Red arrows show the measured rift width along the RGT and component perpendicular to the large-scale rift axis, compared to the actual rift width (black arrows).

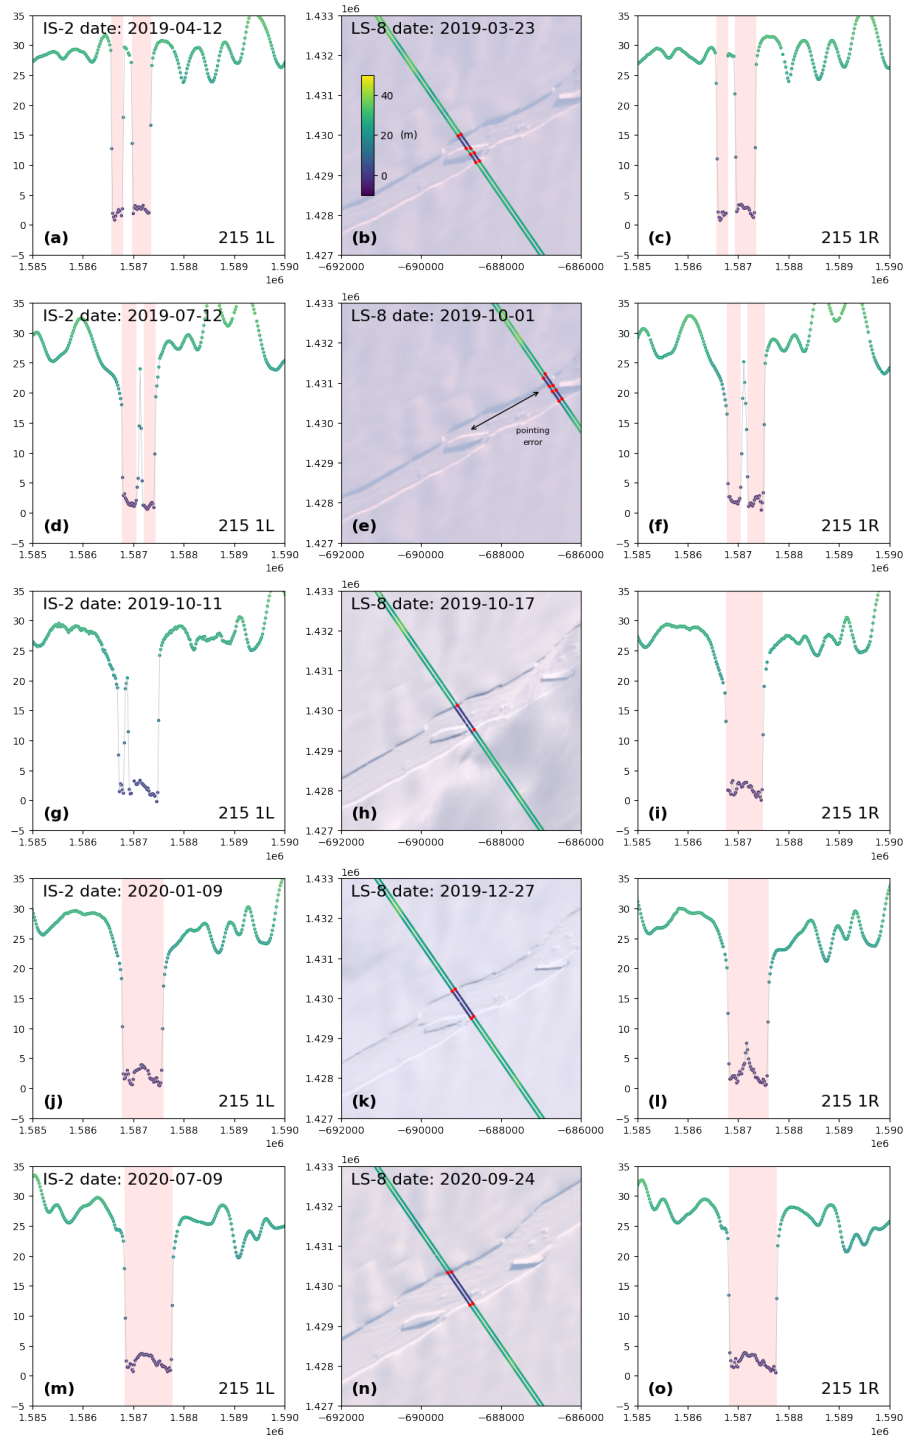

**Figure S8.** Example detections used in Fig. 5d and f along RGT 215 1LR. High confidence rift measurements are shown in light red. Note the satellite pointing error on 2019-07-12. Landsat imagery courtesy of U.S. Geological Survey.

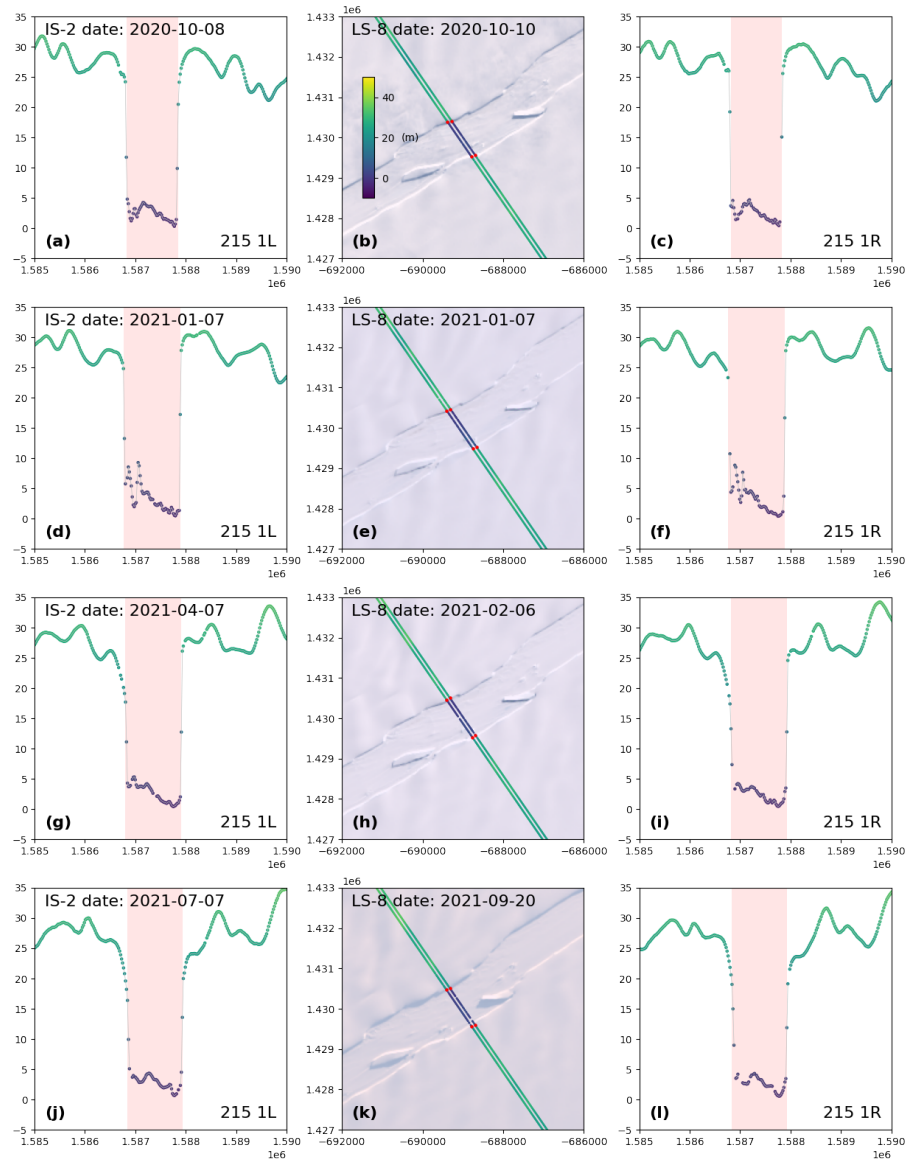

**Figure S9.** Example detections used in Fig. 5d and f along RGT 215 1LR (continued). High confidence rift measurements are shown in light red. Landsat imagery courtesy of U.S. Geological Survey.

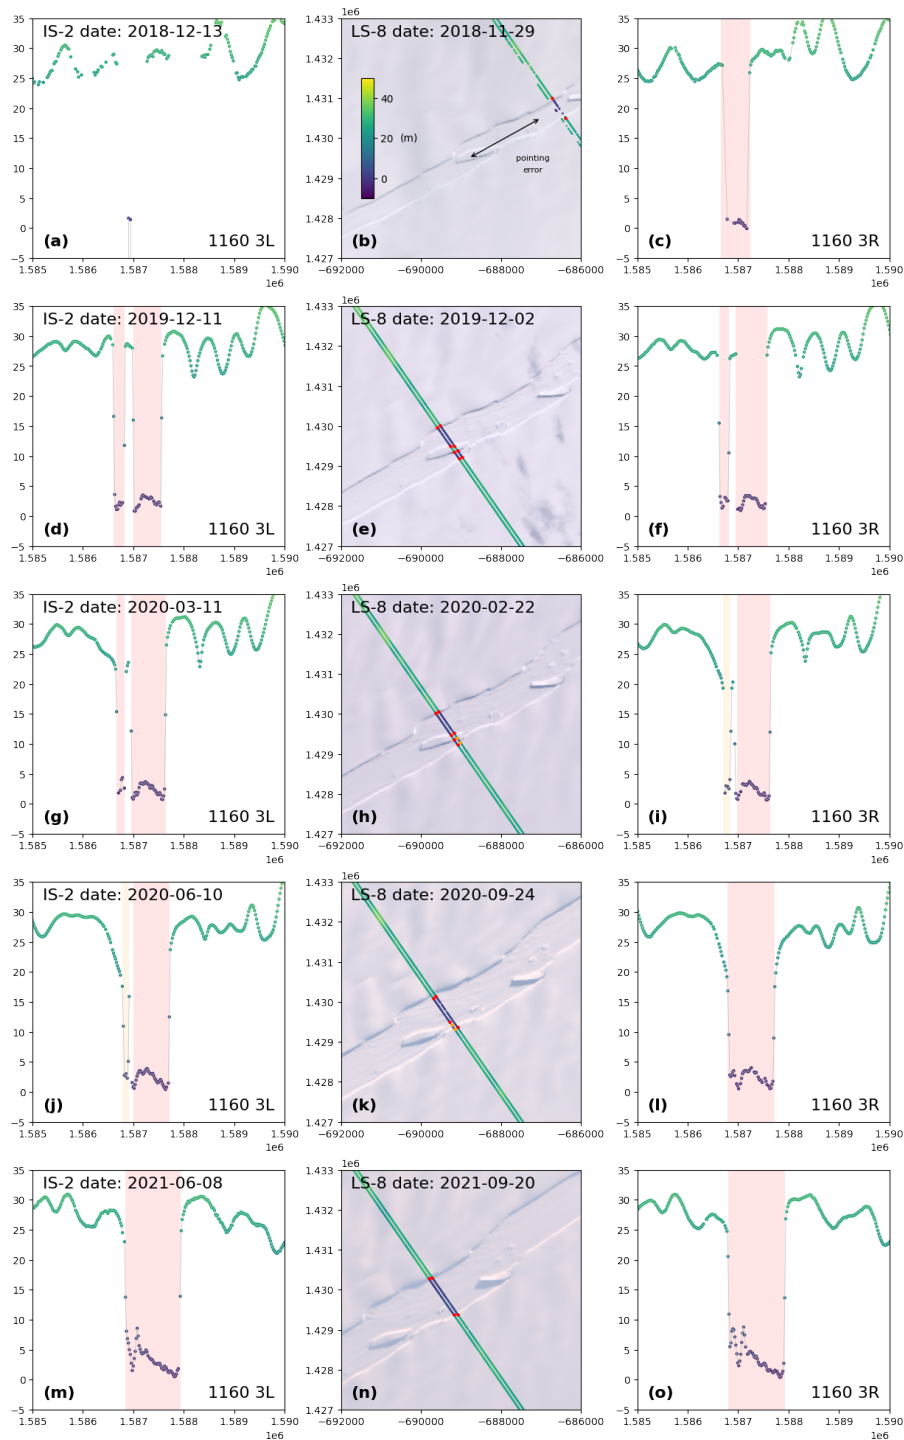

**Figure S10.** Example detections used in Fig. 5a and c along RGT 1160 3LR. High confidence rift measurements are shown in light red, lower confidence measurements in light orange. Note the ICESat-2 pointing error on 2018-12-13. Landsat imagery courtesy of U.S. Geological Survey.

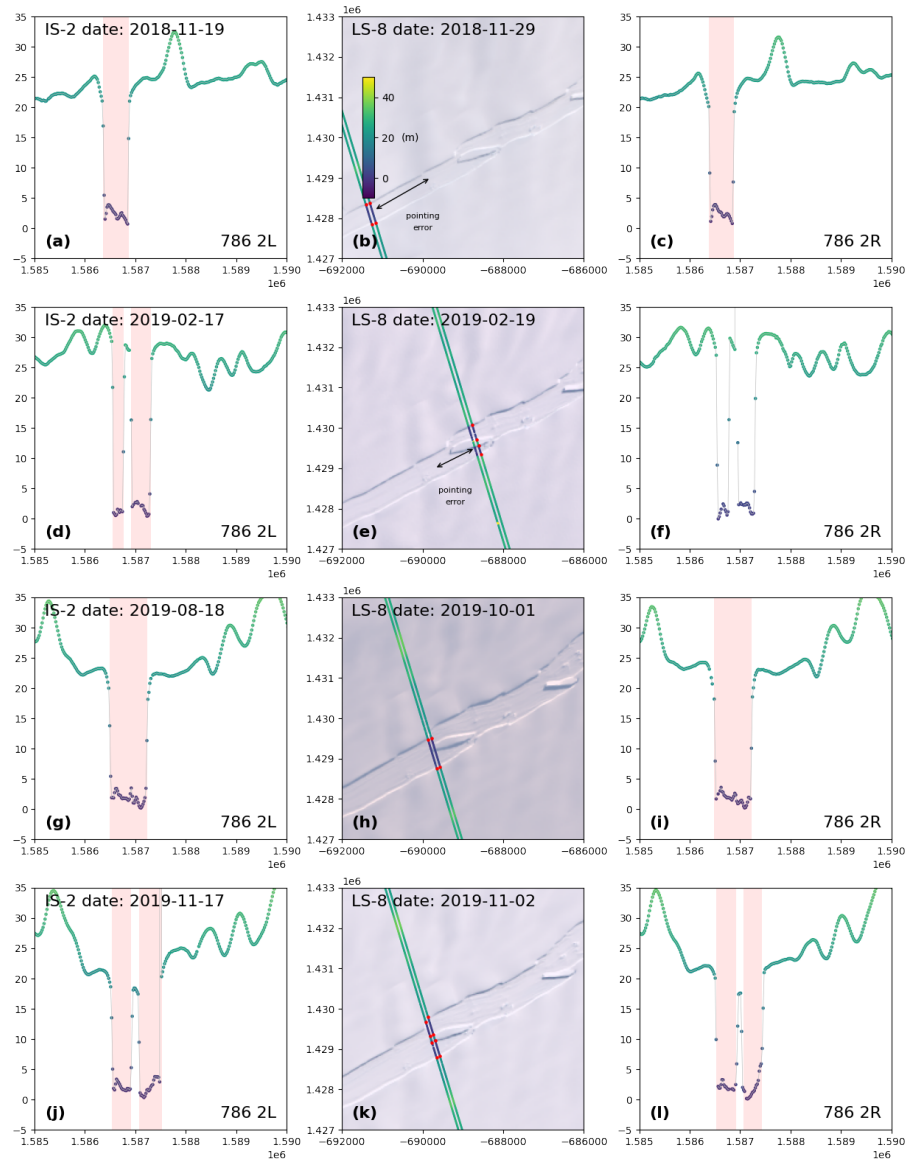

**Figure S11.** Example detections used in Fig. 5g and i along RGT 786 2LR. High confidence rift measurements are shown in light red. Note the ICESat-2 pointing errors on 2018-11-19 and 2019-02-17. Landsat imagery courtesy of U.S. Geological Survey.



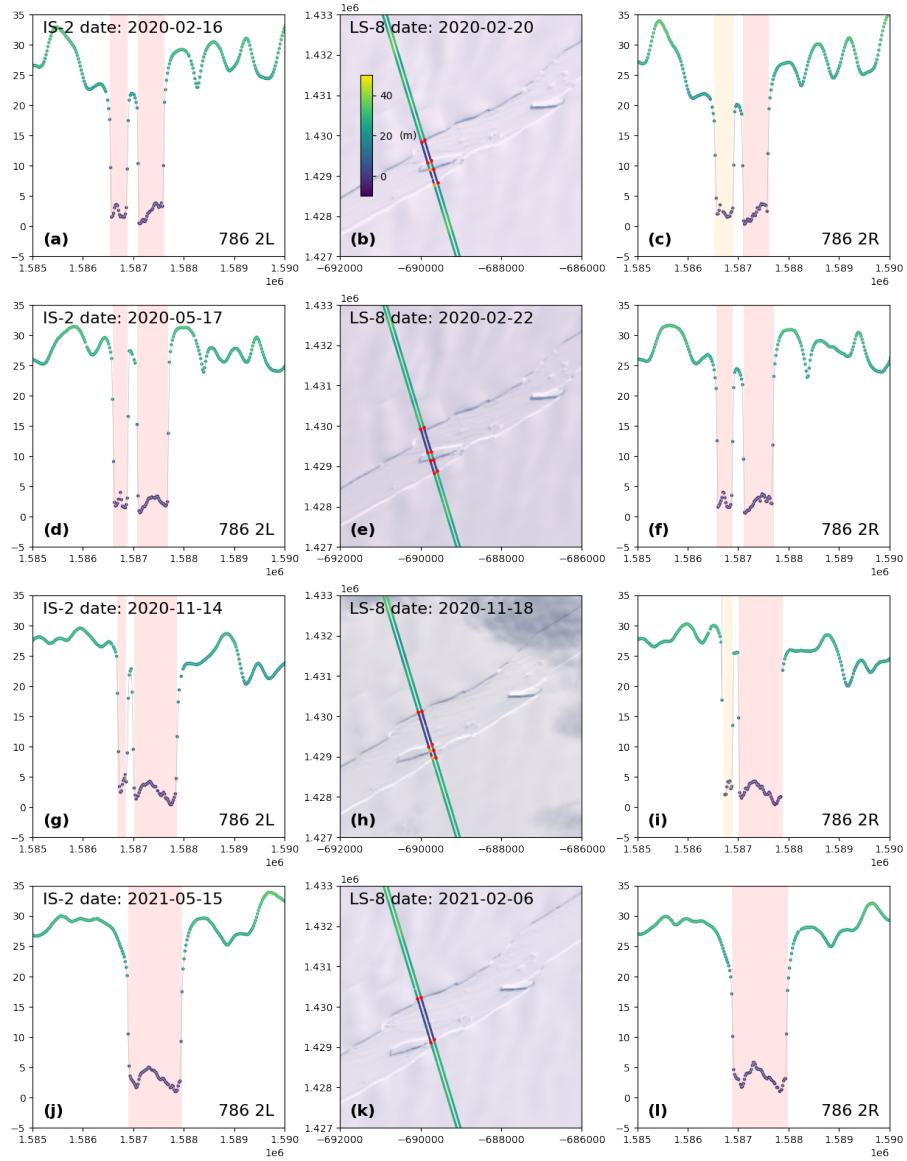

**Figure S12.** Example detections used in Fig. 5g and i along RGT 786 2LR (continued). High confidence rift measurements are shown in light red, lower confidence measurements in light orange. Landsat imagery courtesy of U.S. Geological Survey.

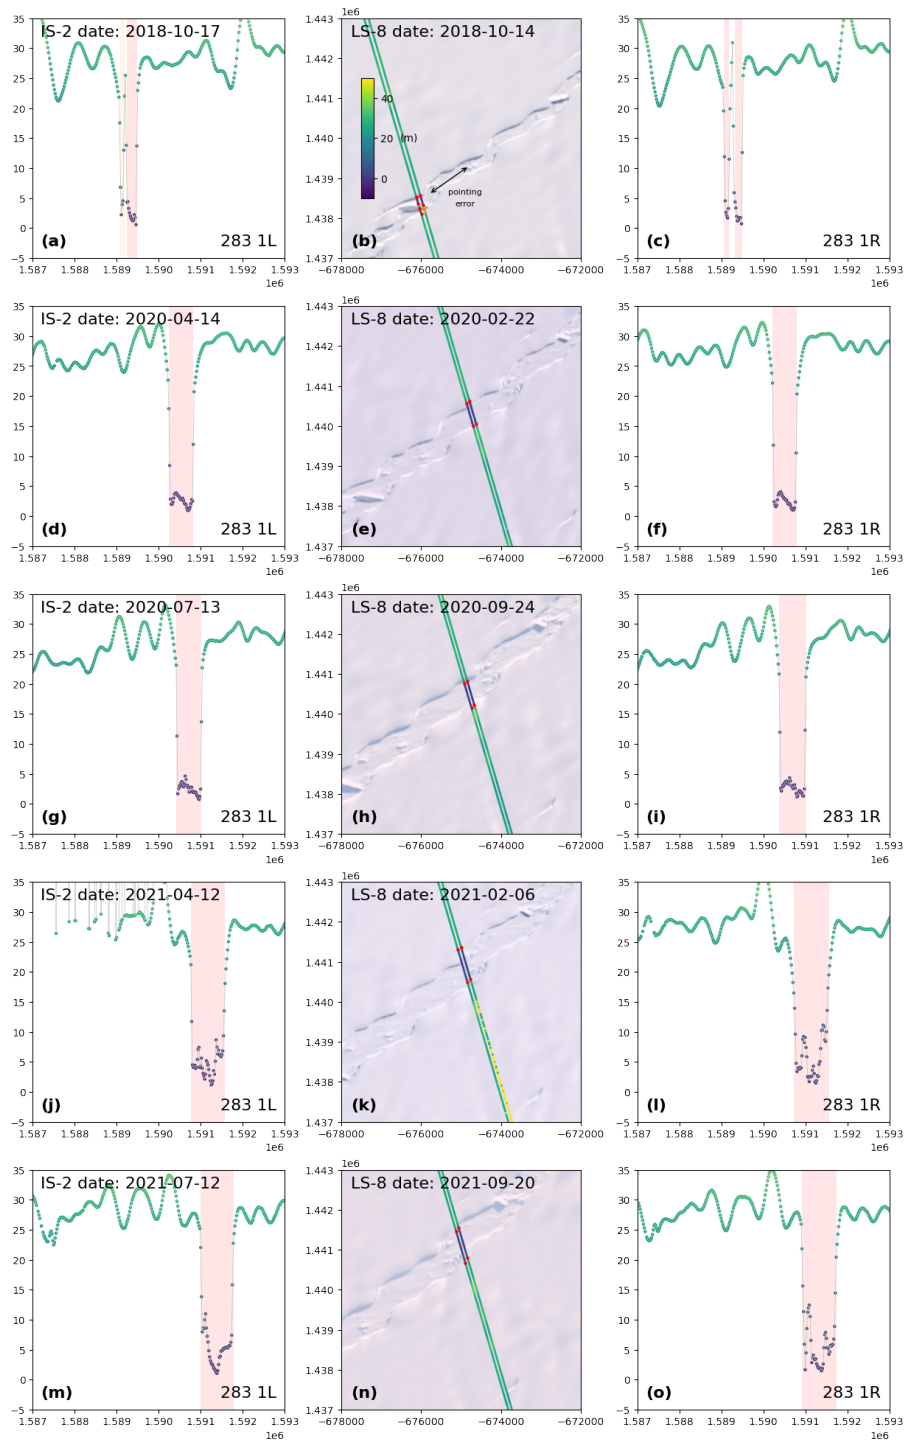

**Figure S13.** Example detections used in Fig. 6a and c along RGT 283 1LR. High confidence rift measurements are shown in light red, lower confidence measurements in light orange. Note the ICESat-2 pointing error on 2018-10-17. Landsat imagery courtesy of U.S. Geological Survey.

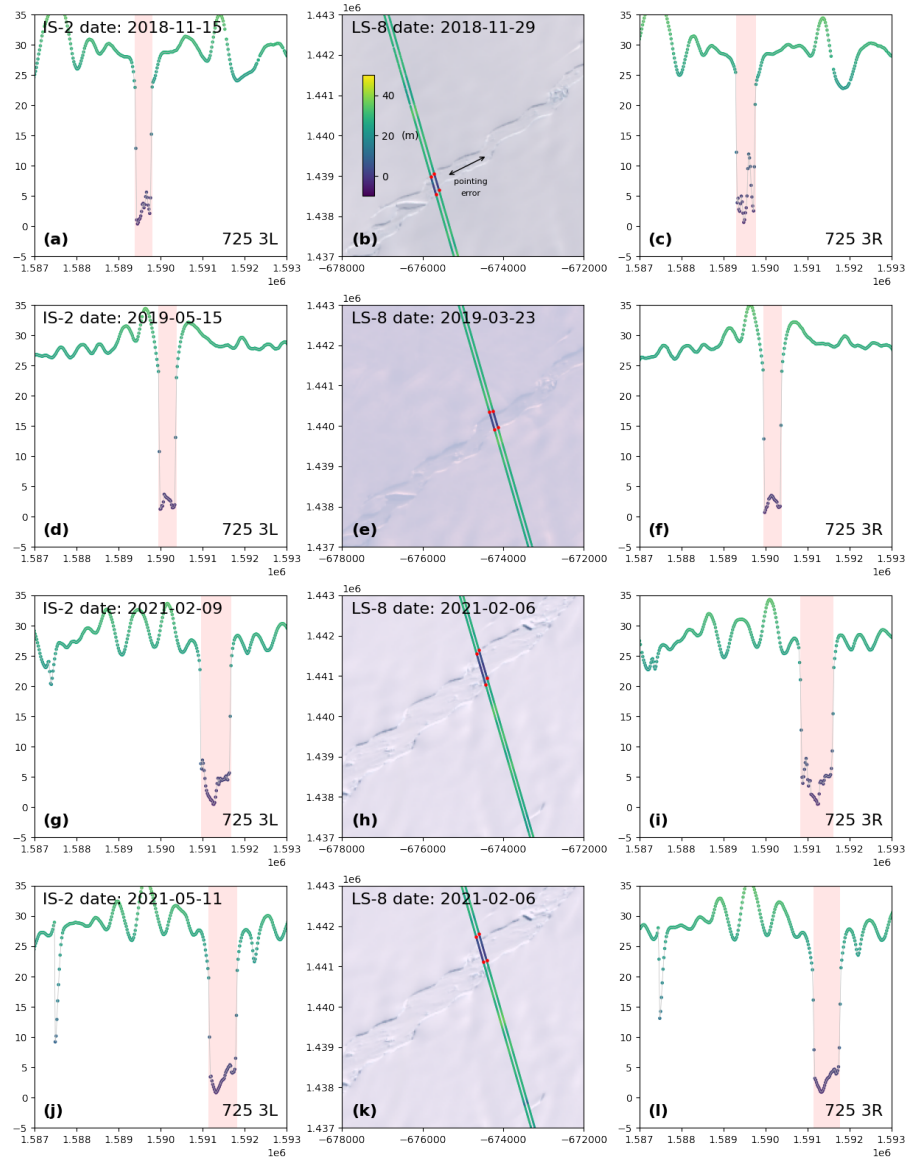

**Figure S14.** Example detections used in Fig. 6d and f along RGT 725 3LR. High confidence rift measurements are shown in light red. Note the ICESat-2 pointing error on 2018-11-15. Landsat imagery courtesy of U.S. Geological Survey.

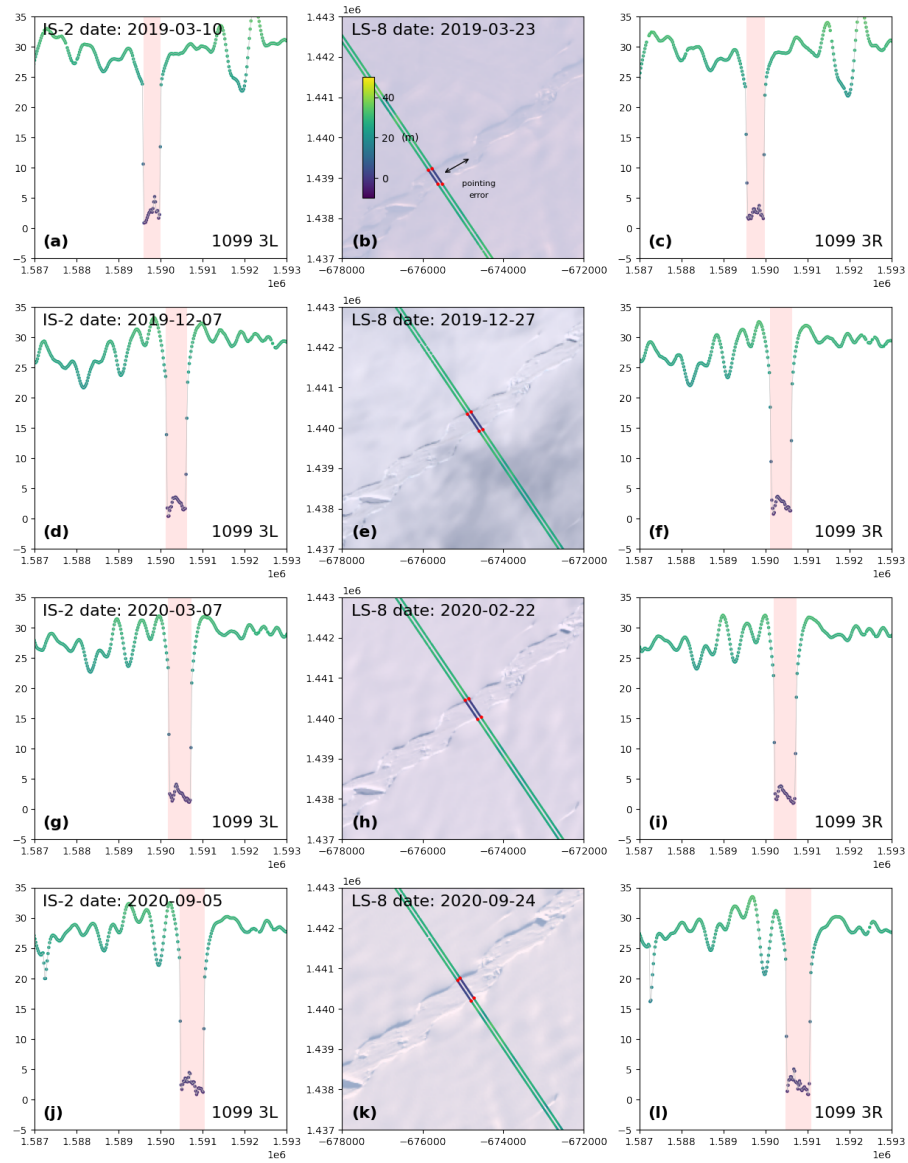

**Figure S15.** Example detections used in Fig. 6g and i along RGT 1099 2LR. High confidence rift measurements are shown in light red. Note the ICESat-2 pointing error on 2019-03-10. Landsat imagery courtesy of U.S. Geological Survey.

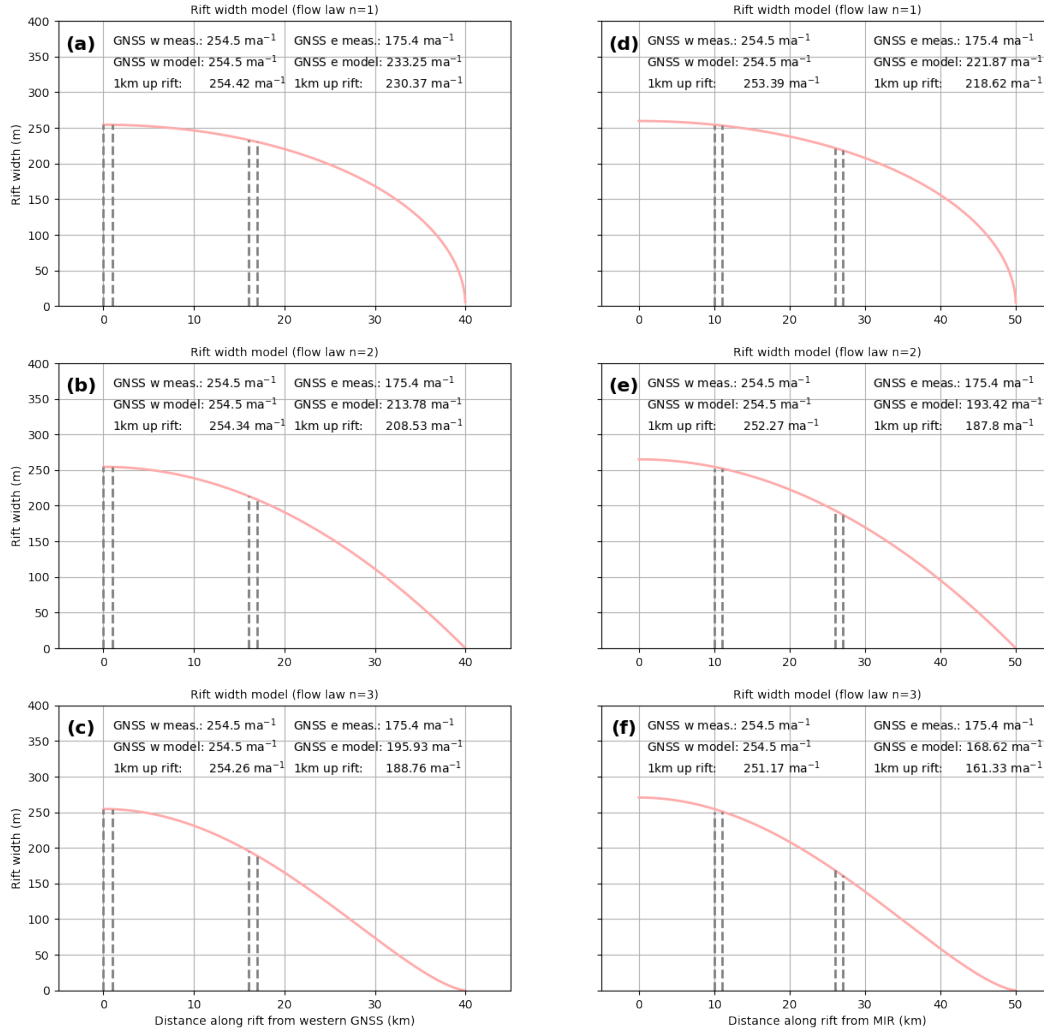

**Figure S16.** The effect of Lagrangian (GNSS) and Eulerian (ICESat-2 and satellite imagery) frames of reference on ICESat-2 rift measurement algorithm validation, resulting from the  $\sim 700\text{--}1000 \text{ m a}^{-1}$  flow of HC approximately perpendicular to ICESat-2 RGTs. Modeled HC opening rates ( $\text{m a}^{-1}$ ) with different flow law parameters ( $n$ ) assuming (a–c) that maximum opening occurs between the western GNSS pair or (d–f) that maximum opening occurs near MIR (50 km from the eastern rift tip). Dashed lines at 0 km and 1 km along rift in a–c and 10 km and 11 km along rift in d–f show the approximate locations of the western GNSS pair and a point 1 km upstream. Dashed lines at 16 km and 17 km along rift in a–c and 26 km and 27 km along rift in d–f show the corresponding approximate locations of the eastern GNSS and a point 1 km upstream. GNSS w/e meas. shows the divergence corrected opening rates from Fig. 7. GNSS w/e model shows the modeled opening rate at the GNSS locations (maximum opening values in d–f were modified until the modeled opening rate at the western GNSS pair agreed with observations). 1 km up rift shows the modeled opening rate 1 km upstream of the GNSS pair locations. In all instances, the difference between modeled and 1 km upstream opening rates is less than  $10 \text{ m a}^{-1}$ , and larger for the eastern GNSS pair, which is closer to the rift tip.



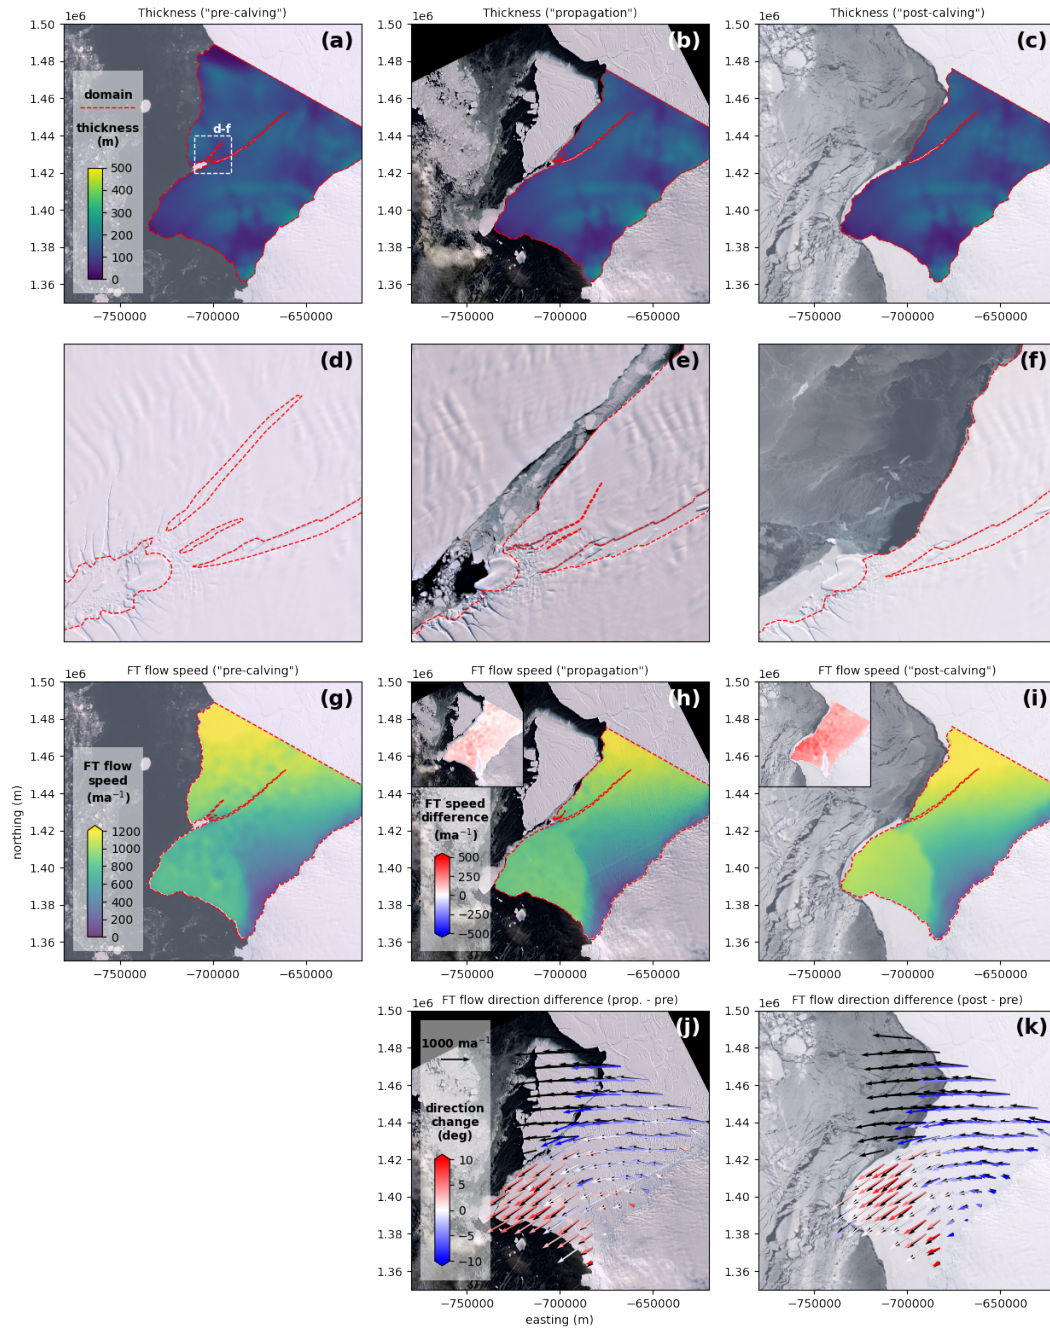

**Figure S17.** *icepack* model inputs. (a–c) Ice shelf thickness DEM cropped to the “pre-calving”, “propagation” and “post-calving” domains (dashed red lines). Dashed white box in a show the location of d–f. (d–f) Fractures in the vicinity of McDonald Ice Rumples in the 3 domains. d includes the ~13 km-long beginning of North Rift. (g–i) Ice flow speed from feature tracking of Sentinel-1 SAR scene pairs. Insets show ice flow speed change compared to prior to calving from NR, demonstrating an increase in ice flow speed. (j, k) Ice flow direction and magnitude change compared to prior to calving. Black arrows show “pre-calving” velocity, colored arrows show “propagation” (j) and “post-calving” (k) velocity, highlighting acceleration and angular change in flow direction (red shows clockwise redirection of flow, blue shows anti-clockwise redirection of flow). Landsat imagery courtesy of U.S. Geological Survey; Copernicus Sentinel-2 data [2021].

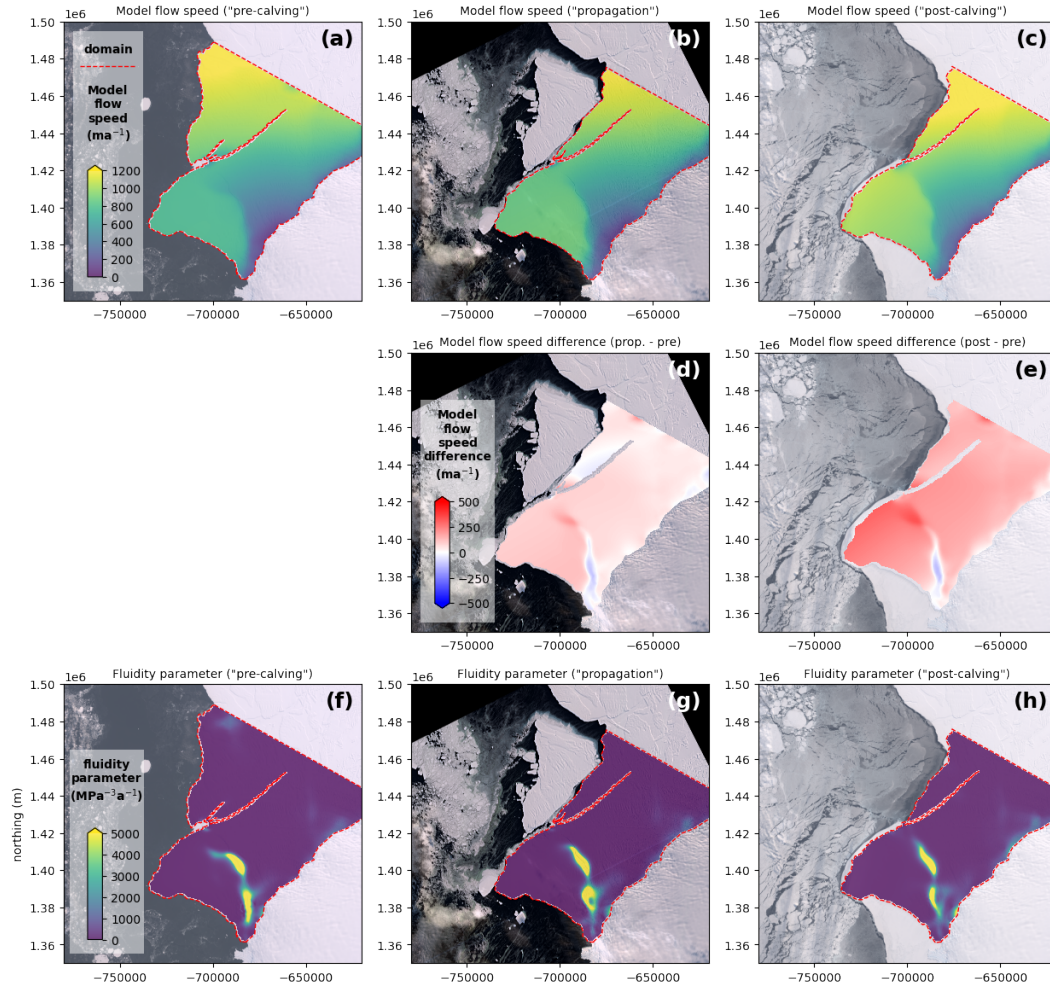

**Figure S18.** *icepack* model outputs. (a–c) Modeled ice flow speed. (d, e) Modeled ice flow speed change compared to prior to calving from NR. (f–h) Modeled fluidity parameter. Landsat imagery courtesy of U.S. Geological Survey; Copernicus Sentinel-2 data [2021].

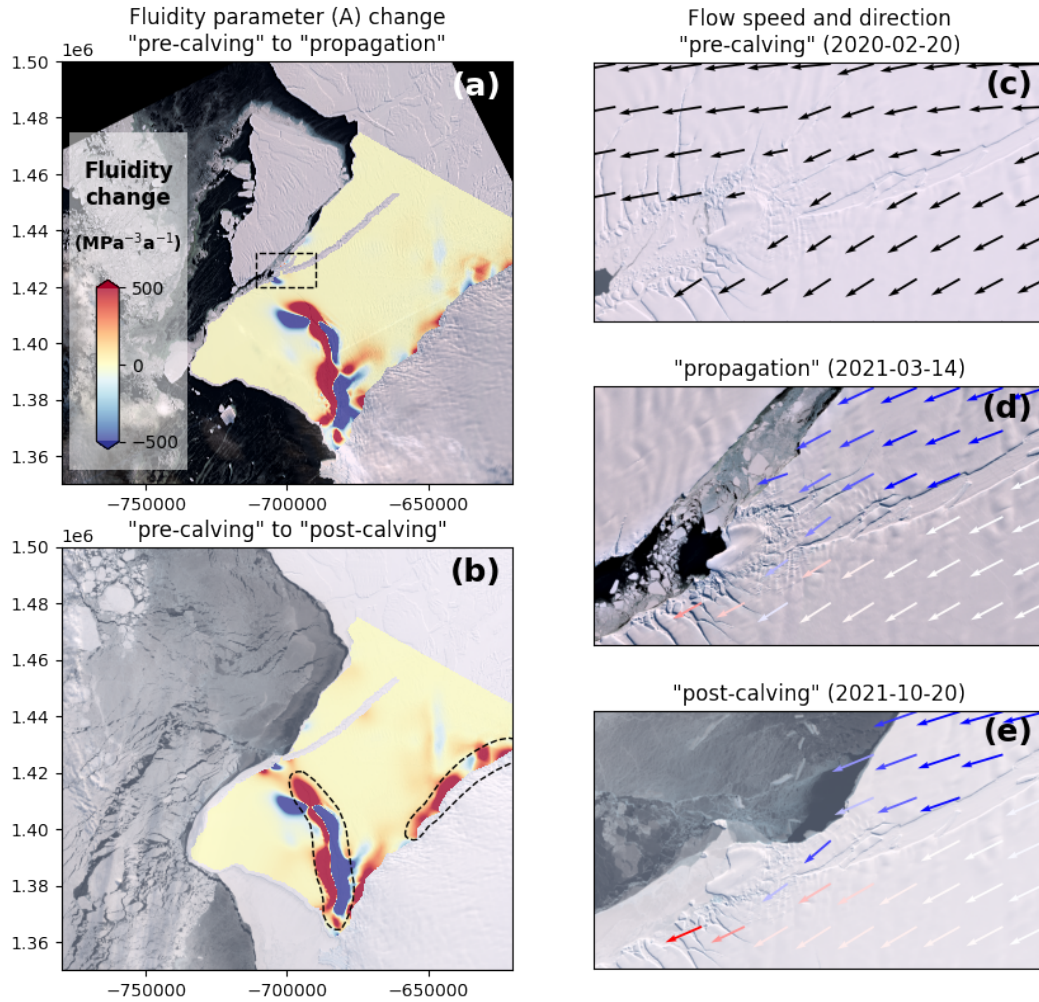

**Figure S19.** Products derived from *icepack* model outputs, in addition to those shown in Fig. 8 in the main manuscript. **(a, b)** Changes in model output fluidity parameter ( $A$ ) between “pre-calving”, “propagation” and “post-calving” periods. Dashed regions in b outline areas with large changes in modeled fluidity. Dashed box in a shows the extent of c–e. **(c–e)** Modeled ice velocity and degree of contact between BIS and MIR during the three periods. Landsat imagery courtesy of U.S. Geological Survey; Copernicus Sentinel-2 data [2021].



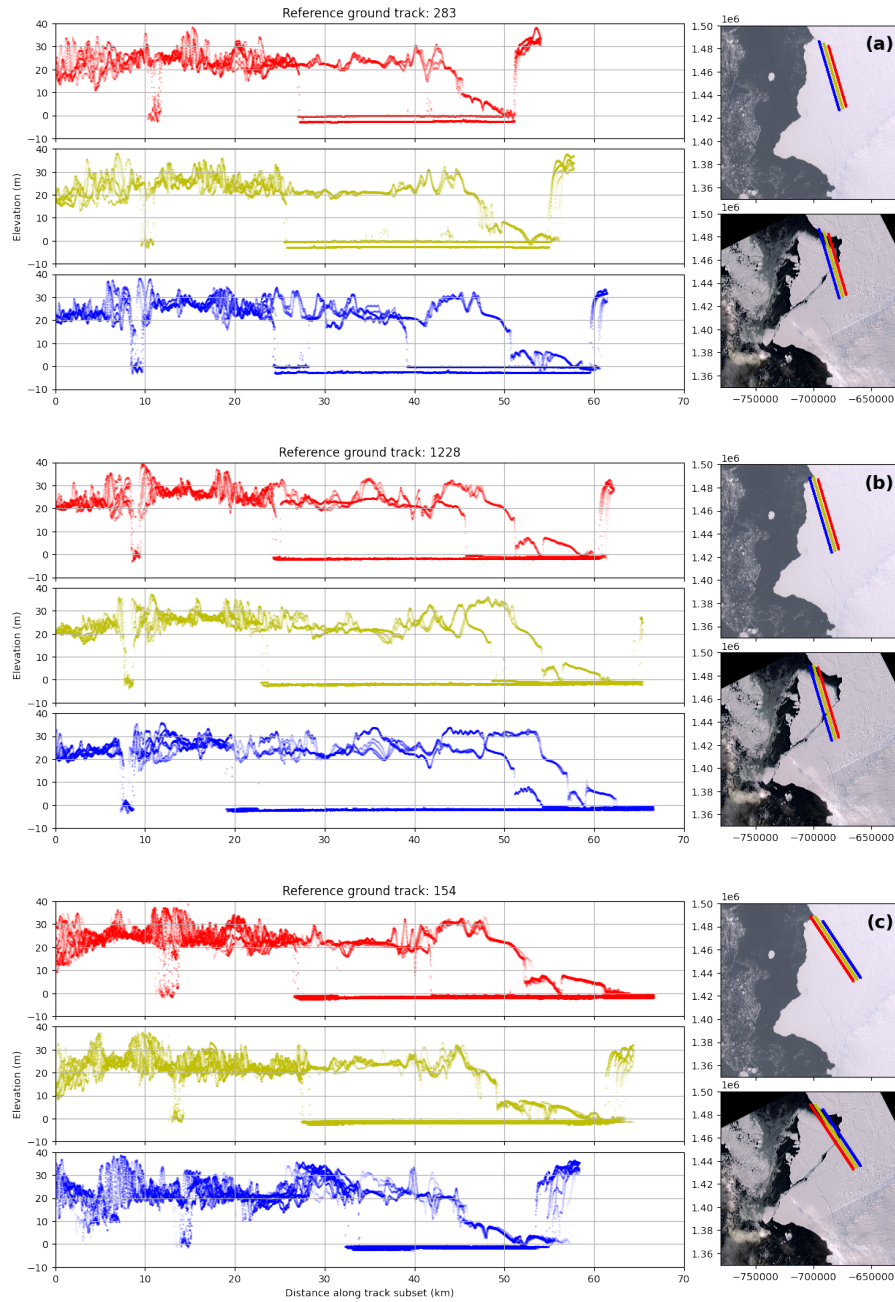

**Figure S20.** Cycle 5 to 15 SlideRule ICESat-2 elevations along RGTs which cross the calving fronts before and after calving from NR, for (a) RGT 283 (b) RGT 1228 (c) RGT 154. Red, yellow and blue denote different beam pairs, with strong and weak beams within each pair combined. Cycles are denoted by different color intensity, with intensity increasing with time. Landsat imagery courtesy of U.S. Geological Survey; Copernicus Sentinel-2 data [2021].

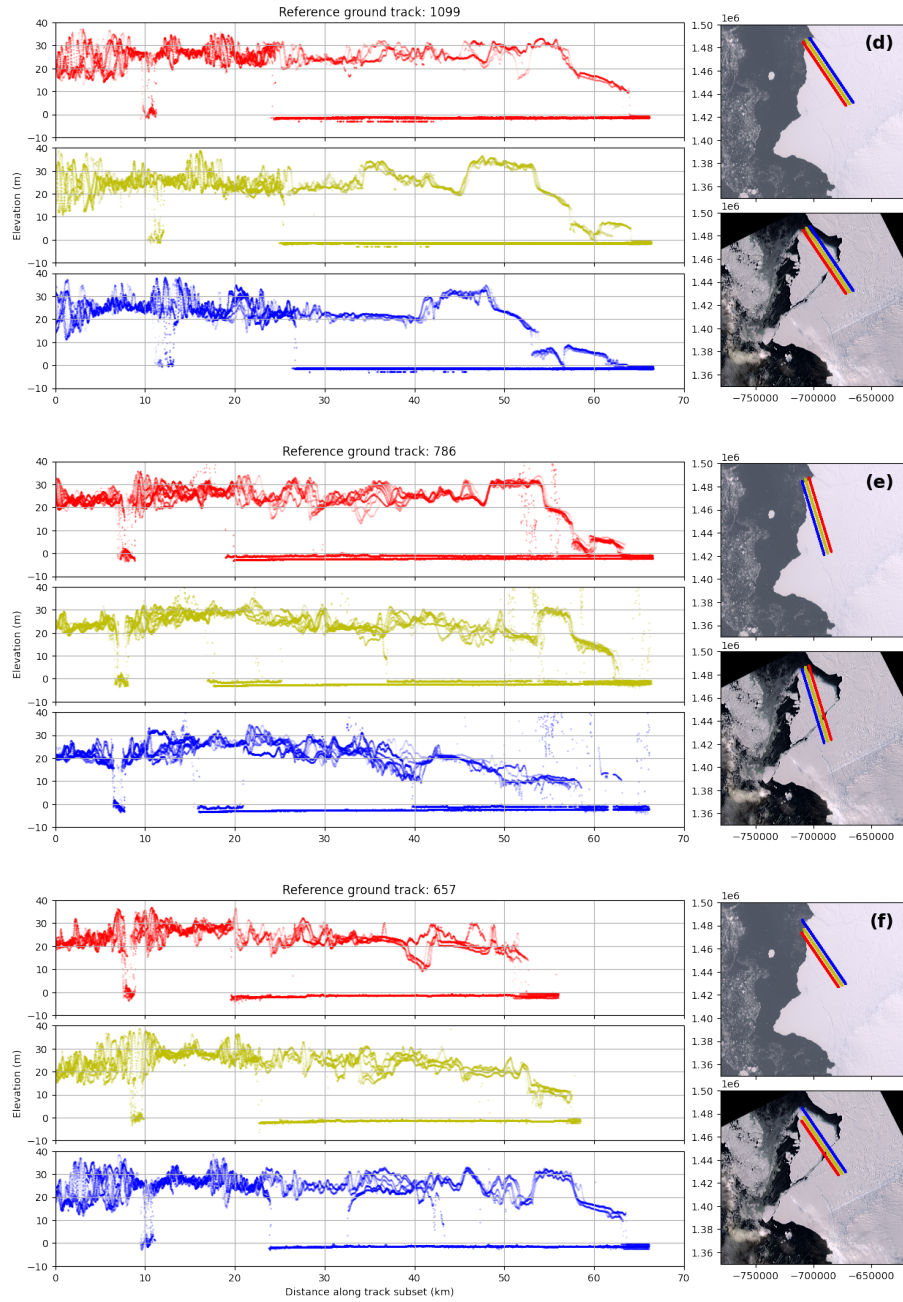

**Figure S21.** As Fig. S20 for (d) RGT 1099 (e) RGT 786 (f) RGT 657. Landsat imagery courtesy of U.S. Geological Survey; Copernicus Sentinel-2 data [2021].

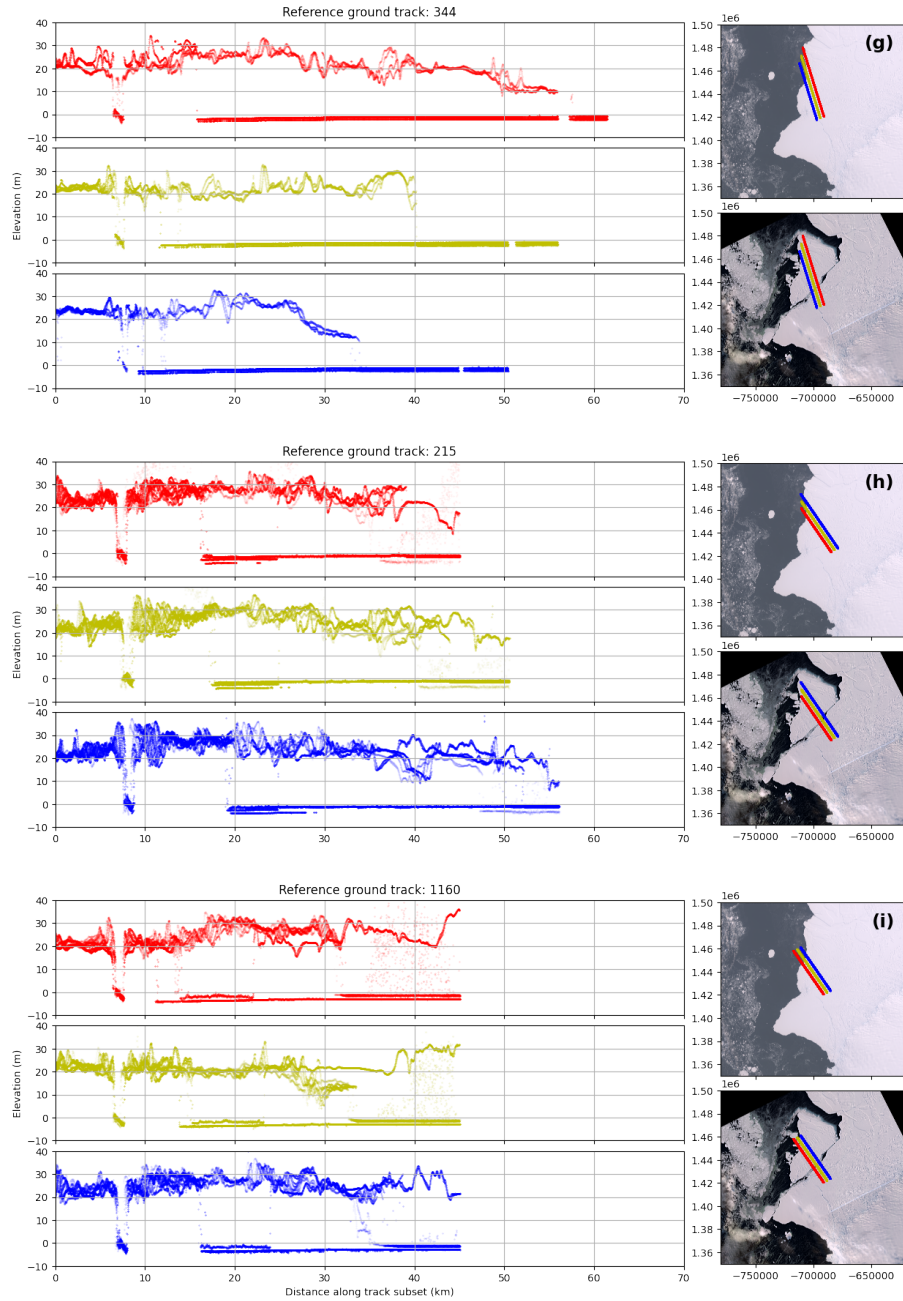

**Figure S22.** As Fig. S20 for (g) RGT 344 (h) RGT 215 (i) RGT 1160. Landsat imagery courtesy of U.S. Geological Survey; Copernicus Sentinel-2 data [2021].

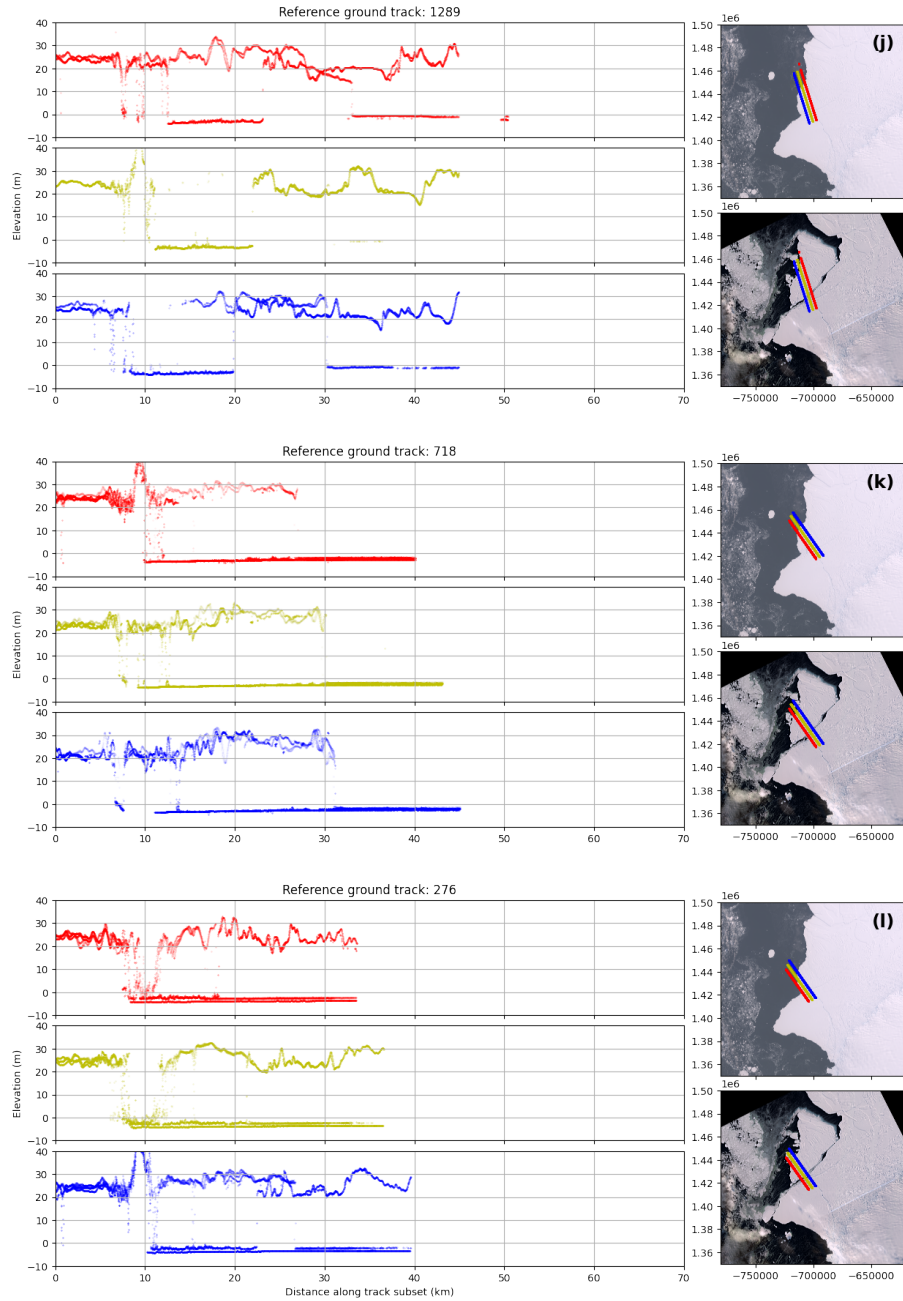

**Figure S23.** As Fig. S20 for (j) RGT 1289 (k) RGT 718 (l) RGT 276. Landsat imagery courtesy of U.S. Geological Survey; Copernicus Sentinel-2 data [2021].

**Table S1.** WorldView-1-3 satellite images used for Halloween Crack width digitization along RGT 215 1LR, RGT 1160 3LR and RGT 786 2LR between the western pair of GNSS receivers.

| Platform    | Date       | ID                                   |
|-------------|------------|--------------------------------------|
| WorldView-1 | 2016-12-04 | WV01_20161204052108_10200100599B5200 |
| WorldView-3 | 2016-12-11 | WV03_20161211020616_1040010026561300 |
| WorldView-1 | 2017-11-17 | WV01_20171117134024_1020010068224000 |
| WorldView-1 | 2017-11-22 | WV01_20171122132254_10200100693F3E00 |
| WorldView-1 | 2018-03-13 | WV01_20180313131607_1020010072B34B00 |
| WorldView-2 | 2018-12-04 | WV02_20181204034234_10300100890D9800 |
| WorldView-1 | 2019-04-11 | WV01_20190411123307_102001007D73A200 |
| WorldView-3 | 2019-09-18 | WV03_20190918110239_10400100519B7300 |
| WorldView-1 | 2019-11-02 | WV01_20191102135533_1020010092CB5600 |
| WorldView-1 | 2019-12-02 | WV01_20191202135059_102001008F659100 |
| WorldView-3 | 2020-02-15 | WV03_20200215104103_1040010058701900 |
| WorldView-1 | 2020-03-22 | WV01_20200322134650_102001009325B500 |
| WorldView-3 | 2020-03-24 | WV03_20200324104234_104001005BCA7B00 |
| WorldView-1 | 2020-11-29 | WV01_20201129054413_102001009EA34400 |
| WorldView-2 | 2020-12-07 | WV02_20201207094927_10300100AE896000 |
| WorldView-3 | 2020-12-09 | WV03_20201209104515_104001006329D800 |
| WorldView-1 | 2021-01-19 | WV01_20210119054306_10200100A2246D00 |
| WorldView-1 | 2021-01-19 | WV01_20210119054212_10200100A22D6900 |
| WorldView-3 | 2022-01-03 | WV03_20220103020527_1040010072CE8500 |
| WorldView-2 | 2022-01-07 | WV02_20220107032223_10300100CB76C500 |

**Table S2.** WorldView-1-3 satellite images used for Halloween Crack width digitization along RGT 283 1LR, RGT 725 3LR and RGT 1099 2LR between the eastern pair of GNSS receivers.

| Platform    | Date       | ID                                   |
|-------------|------------|--------------------------------------|
| WorldView-1 | 2017-04-02 | WV01_20170402131921_1020010061410900 |
| WorldView-1 | 2017-11-17 | WV01_20171117134024_1020010068224000 |
| WorldView-1 | 2017-11-21 | WV01_20171121134611_102001006B664400 |
| WorldView-3 | 2019-01-08 | WV03_20190108024204_1040010045D59A00 |
| WorldView-1 | 2019-04-12 | WV01_20190412134450_1020010086A5AA00 |
| WorldView-2 | 2019-09-17 | WV02_20190917105429_1030010099561200 |
| WorldView-1 | 2019-11-02 | WV01_20191102135533_1020010092CB5600 |
| WorldView-1 | 2019-12-12 | WV01_20191212053208_102001008EA0FE00 |
| WorldView-1 | 2020-03-18 | WV01_20200318134132_1020010097598D00 |
| WorldView-1 | 2020-03-22 | WV01_20200322134704_1020010097B0DB00 |
| WorldView-3 | 2020-03-25 | WV03_20200325105744_104001005980FD00 |
| WorldView-1 | 2020-10-30 | WV01_20201030054839_102001009CBC1C00 |
| WorldView-1 | 2020-11-29 | WV01_20201129054413_102001009EA34400 |
| WorldView-1 | 2021-01-19 | WV01_20210119054244_10200100A1C45600 |
| WorldView-1 | 2021-09-07 | WV01_20210907132654_10200100B6265D00 |
| WorldView-1 | 2021-12-05 | WV01_20211205054543_10200100BA8E5500 |
| WorldView-2 | 2022-01-07 | WV02_20220107032223_10300100CB76C500 |
| WorldView-1 | 2022-02-15 | WV01_20220215133306_10200100BF581B00 |

**Table S3.** Halloween Crack width digitization along RGT 215 1LR, RGT 1160 3LR and RGT 786 2LR between the western pair of GNSS receivers from WorldView-1-3, used in Fig. 5.

| Platform | Date       | width (m) - opening width (wall-to-wall width) |                |               |               |                 |                 |
|----------|------------|------------------------------------------------|----------------|---------------|---------------|-----------------|-----------------|
|          |            | 1160 3L                                        | 1160 3R        | 215 1L        | 215 1R        | 786 2L          | 786 2R          |
| WV1      | 2016-12-04 | 16.7                                           | 16.8           | 21.8          | 14.0          | 16.5            | 16.8            |
| WV3      | 2016-12-11 | 17.9                                           | 18.5           | 17.4          | 14.8          | 18.3            | 17.6            |
| WV1      | 2017-11-17 | 224.7                                          | 219.6          | 230.0         | 228.8         | 211.7           | 214.1           |
| WV1      | 2017-11-22 | 230.9                                          | 222.1          | 232.1         | 230.8         | 215.1           | 212.2           |
| WV1      | 2018-03-13 | 318.8                                          | 319.4          | 318.1         | 321.0         | 303.8           | 301.6           |
| WV2      | 2018-12-04 | 533.8 (591.8)                                  | 548.8          | 515.0 (715.6) | 505.0 (730.4) | 543.0           | 538.6           |
| WV1      | 2019-04-11 | 612.7 (806.6)                                  | 617.8 (781.6)  | 619.0 (789.7) | 628.0 (798.9) | 645.8           | 649.6           |
| WV3      | 2019-09-18 | 725.1 (908.8)                                  | 715.3 (916.1)  | 732.0 (769.5) | 719.0 (843.6) | 765.3           | 832.3 (872.7)   |
| WV1      | 2019-11-02 | 768.6 (932.2)                                  | 760.7 (941.3)  | 750.3         | 806.2 (756.0) | 869.7 (909.5)   | 801.9 (950.7)   |
| WV1      | 2019-12-02 | 786.9 (946.1)                                  | 782.2 (954.0)  | 785.4         | 775.1         | 823.2 (968.4)   | 827.6 (987.9)   |
| WV3      | 2020-02-15 | 853.4 (965.0)                                  | 865.8 (1003.1) | 849.0         | 834.0         | -               | -               |
| WV1      | 2020-03-22 | 869.7 (937.7)                                  | 882.9 (998.5)  | 880.0         | 872.4         | 888.3 (1097.2)  | 889.5 (1097.0)  |
| WV3      | 2020-03-24 | 876.1 (937.7)                                  | 884.4 (1001.2) | 878.0         | 874.0         | 893.2 (1102.8)  | 894.5 (1100.5)  |
| WV1      | 2020-11-29 | 1070.7                                         | 1070.2         | 1118.3        | 1077.8        | 1108.4 (1220.2) | 1094.5 (1195.2) |
| WV2      | 2020-12-07 | 1078.7                                         | 1077.0         | 1088.4        | 1116.9        | 1114.2 (1225.8) | 1093.5 (1190.2) |
| WV3      | 2020-12-09 | 1081.7                                         | 1079.3         | 1120.3        | 1097.8        | 1115.8 (1227.5) | 1098.4 (1191.6) |
| WV1      | 2021-01-19 | 1103.3                                         | 1090.6         | 1112.3        | 1124.4        | 1121.2 (1204.6) | 1148.9          |
| WV1      | 2021-01-19 | 1102.8                                         | 1088.6         | 1118.5        | 1129.8        | -               | -               |
| WV3      | 2022-01-03 | 1141.8                                         | 1165.6         | 1123.8        | 1109.0        | 1172.0          | 1206.7          |
| WV2      | 2022-01-07 | 1146.9                                         | 1163.2         | 1126.4        | 1119.0        | -               | -               |

**Table S4.** Halloween Crack width digitization along RGT 283 1LR, RGT 725 3LR and RGT 1099 2LR between the eastern pair of GNSS receivers from WorldView-1-3, used in Fig. 6.

| Platform | Date       | width (m) - opening width |        |        |        |         |         |
|----------|------------|---------------------------|--------|--------|--------|---------|---------|
|          |            | 283 1L                    | 283 1R | 725 3L | 725 3R | 1099 2L | 1099 2R |
| WV1      | 2017-04-02 | 43.5                      | 41.7   | 36.3   | 39.3   | 36.0    | 39.3    |
| WV1      | 2017-11-17 | 142.6                     | 148.2  | 198.0  | 155.8  | 191.9   | 143.1   |
| WV1      | 2017-11-21 | 139.5                     | 154.2  | 191.1  | 155.9  | 191.9   | 162.2   |
| WV3      | 2019-01-08 | 412.3                     | 429.8  | 363.3  | 256.5  | 335.5   | 320.7   |
| WV1      | 2019-04-12 | 489.1                     | 466.6  | 385.9  | 400.7  | 394.6   | 415.3   |
| WV2      | 2019-09-17 | 460.9                     | 448.3  | 450.5  | 482.5  | 463.1   | 456.6   |
| WV1      | 2019-11-02 | 467.8                     | 474.2  | 511.4  | -      | 474.2   | 487.4   |
| WV1      | 2019-12-12 | 489.2                     | 482.6  | 519.2  | 526.3  | 504.9   | 487.2   |
| WV1      | 2020-03-18 | 534.8                     | 561.3  | 545.7  | 523.0  | 532.1   | 532.4   |
| WV1      | 2020-03-22 | 539.3                     | 560.5  | 531.7  | 512.8  | 531.5   | 534.4   |
| WV3      | 2020-03-25 | -                         | -      | 535.5  | 513.5  | -       | -       |
| WV1      | 2020-10-30 | 620.6                     | 619.5  | 780.0  | 774.6  | 639.1   | 616.7   |
| WV1      | 2020-11-29 | 631.9                     | 624.9  | 790.9  | 788.9  | 665.4   | 643.6   |
| WV1      | 2021-01-19 | 652.4                     | 707.2  | 810.0  | 777.4  | 685.9   | 679.5   |
| WV1      | 2021-09-07 | 682.8                     | 694.0  | 640.3  | 647.7  | 703.1   | 715.9   |
| WV1      | 2021-12-05 | -                         | -      | 662.4  | 663.1  | -       | -       |
| WV2      | 2022-01-07 | 691.7                     | 668.5  | 672.0  | 671.2  | 620.9   | 609.5   |
| WV1      | 2022-02-15 | 677.2                     | 682.9  | 672.2  | 673.3  | 654.4   | 625.9   |



**Table S5.** Landsat-8 OLI and Landsat-9 OLI-2 satellite images used for Halloween Crack width digitization. Imagery downloaded from <https://earthexplorer.usgs.gov>. Landsat Images courtesy of U.S. Geological Survey.

| Platform  | Date       | ID                                       |
|-----------|------------|------------------------------------------|
| Landsat-8 | 2017-11-12 | LC08_L1GT_182114_20171112_20201016_02_T2 |
| Landsat-8 | 2017-12-21 | LC08_L1GT_183114_20171221_20201016_02_T2 |
| Landsat-8 | 2017-12-30 | LC08_L1GT_182114_20171230_20201016_02_T2 |
| Landsat-8 | 2018-01-08 | LC08_L1GT_181114_20180108_20201016_02_T2 |
| Landsat-8 | 2018-02-14 | LC08_L1GT_184114_20180214_20201016_02_T2 |
| Landsat-8 | 2018-03-11 | LC08_L1GT_183114_20180311_20200901_02_T2 |
| Landsat-8 | 2018-09-28 | LC08_L1GT_182114_20180928_20200830_02_T2 |
| Landsat-8 | 2018-10-05 | LC08_L1GT_183114_20181005_20200830_02_T2 |
| Landsat-8 | 2018-10-12 | LC08_L1GT_184114_20181012_20201016_02_T2 |
| Landsat-8 | 2018-10-14 | LC08_L1GT_182114_20181014_20201016_02_T2 |
| Landsat-8 | 2018-10-21 | LC08_L1GT_183114_20181021_20201016_02_T2 |
| Landsat-8 | 2018-11-29 | LC08_L1GT_184114_20181129_20201016_02_T2 |
| Landsat-8 | 2019-01-18 | LC08_L1GT_182114_20190118_20201016_02_T2 |
| Landsat-8 | 2019-02-19 | LC08_L1GT_182114_20190219_20201016_02_T2 |
| Landsat-8 | 2019-03-23 | LC08_L1GT_182114_20190323_20200829_02_T2 |
| Landsat-8 | 2019-10-01 | LC08_L1GT_182114_20191001_20200825_02_T2 |
| Landsat-8 | 2019-10-17 | LC08_L1GT_182114_20191017_20201016_02_T2 |
| Landsat-8 | 2019-10-31 | LC08_L1GT_184114_20191031_20201016_02_T2 |
| Landsat-8 | 2019-11-02 | LC08_L1GT_182114_20191102_20201016_02_T2 |
| Landsat-8 | 2019-12-02 | LC08_L1GT_184114_20191202_20201016_02_T2 |
| Landsat-8 | 2019-12-27 | LC08_L1GT_183114_20191227_20201016_02_T2 |
| Landsat-8 | 2020-01-28 | LC08_L1GT_183114_20200128_20201016_02_T2 |
| Landsat-8 | 2020-02-20 | LC08_L1GT_184114_20200220_20201016_02_T2 |
| Landsat-8 | 2020-02-22 | LC08_L1GT_182114_20200222_20201016_02_T2 |
| Landsat-8 | 2020-09-24 | LC08_L1GT_183114_20200924_20201007_02_T2 |
| Landsat-8 | 2020-10-01 | LC08_L1GT_184114_20201001_20201007_02_T2 |
| Landsat-8 | 2020-10-10 | LC08_L1GT_183114_20201010_20201016_02_T2 |
| Landsat-8 | 2020-10-19 | LC08_L1GT_182114_20201019_20201105_02_T2 |
| Landsat-8 | 2020-11-18 | LC08_L1GT_184114_20201118_20210315_02_T2 |
| Landsat-8 | 2020-12-22 | LC08_L1GT_182114_20201222_20210310_02_T2 |
| Landsat-8 | 2021-01-07 | LC08_L1GT_182114_20210107_20210307_02_T2 |
| Landsat-8 | 2021-01-12 | LC08_L1GT_185114_20210112_20210308_02_T2 |
| Landsat-8 | 2021-01-19 | LC08_L1GT_186113_20210119_20210307_02_T2 |
| Landsat-8 | 2021-02-06 | LC08_L1GT_184114_20210206_20210302_02_T2 |
| Landsat-8 | 2021-03-01 | LC08_L1GT_185113_20210301_20210311_02_T2 |
| Landsat-8 | 2021-03-17 | LC08_L1GT_185114_20210317_20210328_02_T2 |
| Landsat-8 | 2021-03-24 | LC08_L1GT_186113_20210324_20210401_02_T2 |
| Landsat-8 | 2021-04-02 | LC08_L1GT_185113_20210402_20210408_02_T2 |
| Landsat-8 | 2021-04-04 | LC08_L1GT_183114_20210404_20210408_02_T2 |
| Landsat-8 | 2021-09-20 | LC08_L1GT_182114_20210920_20210924_02_T2 |
| Landsat-8 | 2021-09-25 | LC08_L1GT_185113_20210925_20210930_02_T2 |
| Landsat-8 | 2021-10-02 | LC08_L1GT_186113_20211002_20211013_02_T2 |
| Landsat-8 | 2021-10-06 | LC08_L1GT_182114_20211006_20211013_02_T2 |
| Landsat-8 | 2021-10-20 | LC08_L1GT_184114_20211020_20211026_02_T2 |
| Landsat-8 | 2021-11-05 | LC08_L1GT_184114_20211105_20211116_02_T2 |
| Landsat-8 | 2021-11-07 | LC08_L1GT_182114_20211107_20211117_02_T2 |
| Landsat-8 | 2021-12-05 | LC08_L1GT_186113_20211205_20211215_02_T2 |
| Landsat-8 | 2021-12-25 | LC08_L1GT_182114_20211225_20211230_02_T2 |
| Landsat-9 | 2021-12-31 | LC09_L1GT_184114_20211231_20220121_02_T2 |

**Table S6.** Halloween Crack width digitization along RGT 215 1LR, RGT 1160 3LR and RGT 786 2LR between the western pair of GNSS receivers from Landsat-8 and Landsat-9, used in Fig. 5.

| Platform  | Date       | width (m) - opening width (wall-to-wall width) |           |           |           |             |             |
|-----------|------------|------------------------------------------------|-----------|-----------|-----------|-------------|-------------|
|           |            | 1160 3L                                        | 1160 3R   | 215 1L    | 215 1R    | 786 2L      | 786 2R      |
| Landsat-8 | 2017-11-12 | 221                                            | 220       | 224       | 223       | 192         | 195         |
| Landsat-8 | 2017-12-21 | 241                                            | 240       | 251       | 246       | 223         | 220         |
| Landsat-8 | 2017-12-30 | 246                                            | 245       | 268       | 252       | 232         | 225         |
| Landsat-8 | 2018-01-08 | 260                                            | 255       | 259       | 247       | 243         | 244         |
| Landsat-8 | 2018-02-14 | 269                                            | 275       | 270       | 267       | 272         | 268         |
| Landsat-8 | 2018-03-11 | 296                                            | 294       | 283       | 293       | 284         | 281         |
| Landsat-8 | 2018-09-28 | 475                                            | 464       | 404 (645) | 401 (623) | 475         | 456         |
| Landsat-8 | 2018-10-05 | 477                                            | 472       | 427 (663) | 420 (636) | 483         | 462         |
| Landsat-8 | 2018-10-12 | 484                                            | 485       | 435 (671) | 439 (649) | 500         | 478         |
| Landsat-8 | 2018-10-14 | 485                                            | 490       | 442 (669) | 455 (659) | 497         | 476         |
| Landsat-8 | 2018-10-21 | 493                                            | 507       | 442 (665) | 446 (663) | 494         | 483         |
| Landsat-8 | 2018-11-29 | 498 (576)                                      | 544       | 490 (706) | 494 (709) | 532         | 526         |
| Landsat-8 | 2019-01-18 | 536 (684)                                      | 552 (638) | 513 (732) | 513 (740) | 568         | 576         |
| Landsat-8 | 2019-02-19 | 527 (729)                                      | 576 (715) | 534 (746) | 530 (744) | 602         | 597         |
| Landsat-8 | 2019-03-23 | 538 (758)                                      | 584 (763) | 558 (738) | 543 (740) | 607         | 605         |
| Landsat-8 | 2019-10-01 | 676 (903)                                      | 681 (904) | 653 (732) | 667 (797) | 799         | 785 (919)   |
| Landsat-8 | 2019-10-17 | 697 (912)                                      | 685 (923) | 685 (741) | 681 (785) | 788 (856)   | 815 (945)   |
| Landsat-8 | 2019-10-31 | 687 (899)                                      | 720 (940) | 682 (746) | 770       | 836 (927)   | 783 (944)   |
| Landsat-8 | 2019-11-02 | 704 (914)                                      | 720 (931) | 701 (750) | 774       | 821 (913)   | 780 (964)   |
| Landsat-8 | 2019-12-02 | 747 (928)                                      | 713 (924) | 772       | 761       | 835 (985)   | 803 (1007)  |
| Landsat-8 | 2019-12-27 | 791 (950)                                      | 752 (947) | 765       | 796       | 811 (966)   | 832 (1034)  |
| Landsat-8 | 2020-01-28 | 799 (947)                                      | 815 (983) | 808       | 805       | 860 (1038)  | 831 (1060)  |
| Landsat-8 | 2020-02-20 | 819 (946)                                      | 813 (987) | 838       | 826       | 871 (1084)  | 852 (1087)  |
| Landsat-8 | 2020-02-22 | 824 (952)                                      | 805 (988) | 838       | 832       | 863 (1083)  | 863 (1099)  |
| Landsat-8 | 2020-09-24 | 993                                            | 979       | 979       | 990       | 979 (1170)  | 973 (1150)  |
| Landsat-8 | 2020-10-01 | 992                                            | 992       | 982       | 993       | 986 (1172)  | 982 (1154)  |
| Landsat-8 | 2020-10-10 | 1006                                           | 1000      | 1015      | 1012      | 1001(1184)  | 1001 (1171) |
| Landsat-8 | 2020-10-19 | 1015                                           | 1004      | 1026      | 1019      | 1020 (1194) | 1047 (1184) |
| Landsat-8 | 2020-11-18 | 1046                                           | 1052      | 1077      | 1043      | 1064 (1214) | 1063 (1200) |
| Landsat-8 | 2020-12-22 | 1068                                           | 1062      | 1104      | 1111      | 1094 (1223) | 1071 (1157) |
| Landsat-8 | 2021-01-07 | 1077                                           | 1066      | 1104      | 1106      | 1094 (1210) | 1074 (1149) |
| Landsat-8 | 2021-01-12 | 1100                                           | 1091      | 1127      | 1130      | 1092 (1202) | 1075 (1140) |
| Landsat-8 | 2021-01-19 | 1108                                           | 1095      | 1114      | 1130      | 1108 (1202) | 1080 (1139) |
| Landsat-8 | 2021-02-06 | 1082                                           | 1066      | 1101      | 1106      | 1130 (1198) | 1081 (1130) |
| Landsat-8 | 2021-03-01 | 1101                                           | 1106      | 1121      | 1120      | 1047 (1115) | 1110        |
| Landsat-8 | 2021-03-17 | 1101                                           | 1096      | 1094      | 1106      | 1096        | 1105        |
| Landsat-8 | 2021-03-24 | 1094                                           | 1099      | 1100      | 1100      | 1099        | 1085        |
| Landsat-8 | 2021-04-02 | 1113                                           | 1093      | 1106      | 1095      | 1091        | 1084        |
| Landsat-8 | 2021-04-04 | 1084                                           | 1088      | 1078      | 1082      | 1108        | 1077        |
| Landsat-8 | 2021-09-20 | 1132                                           | 1126      | 1052      | 1066      | 1067        | 1050        |
| Landsat-8 | 2021-09-25 | 1130                                           | 1127      | 1073      | 1071      | 1076        | 1073        |
| Landsat-8 | 2021-10-02 | 1158                                           | 1139      | 1081      | 1089      | 1080        | 1082        |
| Landsat-8 | 2021-10-06 | 1152                                           | 1145      | 1068      | 1069      | 1076        | 1083        |
| Landsat-8 | 2021-10-20 | 1162                                           | 1154      | 1067      | 1080      | 1089        | 1094        |
| Landsat-8 | 2021-11-05 | 1163                                           | 1166      | 1070      | 1085      | 1090        | 1118        |
| Landsat-8 | 2021-11-07 | 1166                                           | 1171      | 1076      | 1080      | 1104        | 1127        |
| Landsat-8 | 2021-12-05 | 1136                                           | 1172      | 1096      | 1087      | 1137        | 1152        |
| Landsat-8 | 2021-12-25 | 1134                                           | 1179      | 1104      | 1096      | 1165        | 1186        |
| Landsat-9 | 2021-12-31 | 1134                                           | 1164      | 1117      | 1107      | 1166        | 1210        |

**Table S7.** Halloween Crack width digitization along RGT 283 1LR, RGT 725 3LR and RGT 1099 2LR between the eastern pair of GNSS receivers from Landsat-8 and Landsat-9, used in Fig. 6.

| Platform  | Date       | width (m) - opening width |        |        |        |         |         |
|-----------|------------|---------------------------|--------|--------|--------|---------|---------|
|           |            | 283 1L                    | 283 1R | 725 3L | 725 3R | 1099 2L | 1099 2R |
| Landsat-8 | 2017-11-12 | 123                       | 138    | 164    | 131    | 191     | 172     |
| Landsat-8 | 2017-12-21 | 172                       | 166    | 181    | 151    | 203     | 194     |
| Landsat-8 | 2017-12-30 | 171                       | 175    | 179    | 162    | 209     | 204     |
| Landsat-8 | 2018-01-08 | 174                       | 193    | 174    | 153    | 195     | 222     |
| Landsat-8 | 2018-02-14 | 207                       | 189    | 189    | 171    | 203     | 209     |
| Landsat-8 | 2018-03-11 | 193                       | 203    | 185    | 178    | 200     | 209     |
| Landsat-8 | 2018-09-28 | 272                       | 279    | 392    | 310    | 291     | 289     |
| Landsat-8 | 2018-10-05 | 288                       | 289    | 380    | 324    | 304     | 310     |
| Landsat-8 | 2018-10-12 | 305                       | 318    | 359    | 337    | 305     | 308     |
| Landsat-8 | 2018-10-14 | 303                       | 313    | 370    | 340    | 305     | 309     |
| Landsat-8 | 2018-10-21 | 316                       | 331    | 361    | 344    | 313     | 318     |
| Landsat-8 | 2018-11-29 | 335                       | 332    | 372    | 341    | 318     | 323     |
| Landsat-8 | 2019-01-18 | 414                       | 443    | 351    | 341    | 351     | 331     |
| Landsat-8 | 2019-02-19 | 485                       | 475    | 367    | 370    | 357     | 334     |
| Landsat-8 | 2019-03-23 | 465                       | 481    | 367    | 362    | 349     | 367     |
| Landsat-8 | 2019-10-01 | 452                       | 439    | 456    | 488    | 445     | 450     |
| Landsat-8 | 2019-10-17 | 459                       | 452    | 472    | 491    | 464     | 451     |
| Landsat-8 | 2019-10-31 | 438                       | 444    | 457    | 471    | 455     | 452     |
| Landsat-8 | 2019-11-02 | 472                       | 464    | 488    | 495    | 462     | 474     |
| Landsat-8 | 2019-12-02 | 479                       | 481    | 502    | 509    | 480     | 482     |
| Landsat-8 | 2019-12-27 | 478                       | 481    | 516    | 491    | 483     | 501     |
| Landsat-8 | 2020-01-28 | 490                       | 510    | 506    | 496    | 506     | 507     |
| Landsat-8 | 2020-02-20 | 506                       | 507    | 508    | 482    | 508     | 515     |
| Landsat-8 | 2020-02-22 | 513                       | 527    | 501    | 492    | 520     | 522     |
| Landsat-8 | 2020-09-24 | 586                       | 565    | 691    | 730    | 579     | 578     |
| Landsat-8 | 2020-10-01 | 597                       | 574    | 723    | 747    | 595     | 581     |
| Landsat-8 | 2020-10-10 | 604                       | 585    | 727    | 782    | 604     | 588     |
| Landsat-8 | 2020-10-19 | 605                       | 592    | 770    | 780    | 614     | 590     |
| Landsat-8 | 2020-11-18 | 621                       | 569    | 774    | 791    | 623     | 618     |
| Landsat-8 | 2020-12-22 | 633                       | 651    | 799    | 786    | 650     | 651     |
| Landsat-8 | 2021-01-07 | 641                       | 667    | 780    | 800    | 669     | 667     |
| Landsat-8 | 2021-01-12 | 635                       | 684    | 807    | 724    | 683     | 688     |
| Landsat-8 | 2021-01-19 | 640                       | 674    | 796    | 756    | 674     | 681     |
| Landsat-8 | 2021-02-06 | 653                       | 714    | 802    | 794    | 664     | 670     |
| Landsat-8 | 2021-03-17 | 761                       | 775    | 694    | 664    | 608     | 664     |
| Landsat-8 | 2021-03-24 | 770                       | 801    | 694    | 647    | 595     | 674     |
| Landsat-8 | 2021-04-02 | 760                       | 793    | 659    | 631    | 564     | 645     |
| Landsat-8 | 2021-04-04 | 760                       | 795    | 645    | 629    | 562     | 673     |
| Landsat-8 | 2021-09-20 | 693                       | 643    | 616    | 614    | 713     | 690     |
| Landsat-8 | 2021-09-25 | 679                       | 657    | 624    | 614    | 702     | 665     |
| Landsat-8 | 2021-10-02 | 687                       | 663    | 640    | 631    | 684     | 688     |
| Landsat-8 | 2021-10-06 | 682                       | 671    | 635    | 637    | 688     | 718     |
| Landsat-8 | 2021-10-20 | 673                       | 682    | 650    | 637    | 692     | 723     |
| Landsat-8 | 2021-11-05 | 685                       | 689    | 640    | 645    | 667     | 698     |
| Landsat-8 | 2021-11-07 | 670                       | 686    | 647    | 657    | 665     | 689     |
| Landsat-8 | 2021-12-05 | 693                       | 678    | 668    | 662    | 643     | 684     |
| Landsat-8 | 2021-12-25 | 694                       | 668    | 666    | 672    | 640     | 653     |
| Landsat-9 | 2021-12-31 | 697                       | 652    | 676    | 655    | 623     | 620     |

**Table S8.** Sentinel-1 SAR and Sentinel-2 and Landsat-8 optical imagery used for ice flow modeling. Ice flow velocity was calculated by applying a feature tracking algorithm to Sentinel-1 SAR scene pairs separated by 12 days using the SeNtinel Applications Platform (SNAP). The model domain was defined using Sentinel-2 and Landsat-8 images.

| Period         | Sentinel-1 pair and Sentinel-2/Landsat-8 images                     |
|----------------|---------------------------------------------------------------------|
| “Pre-calving”  | S1A_IW_GRDH_1SSH_20200228T035038_20200228T035107_031447_039EDA_15B1 |
|                | S1A_IW_GRDH_1SSH_20200311T035039_20200311T035107_031622_03A4ED_53C5 |
|                | LC08_L1GT_184113_20200220_20201016_02_T2                            |
|                | LC08_L1GT_184114_20200220_20201016_02_T2                            |
| “Propagation”  | S1A_IW_GRDH_1SSH_20210318T035044_20210318T035113_037047_045C31_C4C6 |
|                | S1A_IW_GRDH_1SSH_20210330T035045_20210330T035113_037222_04623E_9BAF |
|                | S2B_MSIL2A_20210314T100059_N0214_R093_T26CNB_20210314T120106        |
|                | S2B_MSIL2A_20210314T100059_N0214_R093_T26CNA_20210314T120106        |
|                | S2B_MSIL2A_20210314T100059_N0214_R093_T26CMA_20210314T120106        |
|                | S2B_MSIL1C_20210314T100059_N0209_R093_T26CMB_20210314T113145        |
| “Post-calving” | S1A_IW_GRDH_1SSH_20211125T035053_20211125T035122_040722_04D518_F687 |
|                | S1A_IW_GRDH_1SSH_20211207T035053_20211207T035121_040897_04DB2E_4704 |
|                | LC08_L1GT_184113_20211020_20211026_02_T2                            |
|                | LC08_L1GT_184114_20211020_20211026_02_T2                            |

**Table S9.** Inputs to *icepack* (diagnostic) inverse and additional diagnostic model runs and calculated HC opening rates. Inverse model runs take SNAP feature tracked velocity fields (Table S8) as initial-guess inputs, and output modeled velocity and fluidity fields. These outputs are used as inputs to the additional diagnostic model runs. HC opening rates between the western and eastern GNSS pairs are calculated as the difference in the rift perpendicular components of velocity north (N perp.) and south (S perp.) of the rift.

| Model                     | Velocity                             | Fluidity                 | Geometry<br>(extent/rift) | Temp.<br>(K) | Western Pair                    |                                 |                              | Eastern Pair                    |                                 |                              |
|---------------------------|--------------------------------------|--------------------------|---------------------------|--------------|---------------------------------|---------------------------------|------------------------------|---------------------------------|---------------------------------|------------------------------|
|                           |                                      |                          |                           |              | N perp.<br>(m a <sup>-1</sup> ) | S perp.<br>(m a <sup>-1</sup> ) | rate<br>(m a <sup>-1</sup> ) | N perp.<br>(m a <sup>-1</sup> ) | S perp.<br>(m a <sup>-1</sup> ) | rate<br>(m a <sup>-1</sup> ) |
| “pre-calving”<br>Inverse  | FT pre<br>(output:<br>model pre)     | (output:<br>model pre)   | pre/pre                   | 253          | 416.7                           | 159.8                           | <b>257.0</b>                 | 649.0                           | 455.9                           | <b>193.1</b>                 |
| “propagation”<br>Inverse  | FT prop.<br>(output:<br>model prop.) | (output:<br>model prop.) | prop./prop.               | 253          | 227.7                           | 174.1                           | <b>53.6</b>                  | 505.1                           | 468.7                           | <b>36.4</b>                  |
| “post-calving”<br>Inverse | FT post<br>(output:<br>model post)   | (output:<br>model post)  | post/post                 | 253          | 327.9                           | 191.4                           | <b>136.5</b>                 | 605.2                           | 517.6                           | <b>87.6</b>                  |
| Diagnostic <sub>1</sub>   | model pre                            | model pre                | pre/pre                   | 253          | 463.6                           | 178.2                           | <b>285.4</b>                 | 650.4                           | 461.4                           | <b>189.0</b>                 |
| Diagnostic <sub>2</sub>   | model pre                            | model pre                | prop./pre                 | 253          | 461.8                           | 174.1                           | <b>287.7</b>                 | 658.1                           | 459.1                           | <b>199.0</b>                 |
| Diagnostic <sub>3</sub>   | model pre                            | model pre                | post/pre                  | 253          | 497.9                           | 179.2                           | <b>318.7</b>                 | 671.6                           | 468.9                           | <b>202.7</b>                 |
| Diagnostic <sub>4</sub>   | model pre                            | model pre                | prop./prop.               | 253          | 430.4                           | 184.7                           | <b>245.7</b>                 | 650.2                           | 471.5                           | <b>178.7</b>                 |
| Diagnostic <sub>5</sub>   | model pre                            | model pre                | post/post                 | 253          | 428.9                           | 180.3                           | <b>248.7</b>                 | 659.6                           | 467.4                           | <b>192.1</b>                 |
| Diagnostic <sub>6</sub>   | model prop.                          | model pre                | prop./pre                 | 253          | 268.5                           | 175.3                           | <b>93.2</b>                  | 515.6                           | 449.2                           | <b>66.4</b>                  |
| Diagnostic <sub>7</sub>   | model post                           | model pre                | post/pre                  | 253          | 417.3                           | 157.6                           | <b>259.7</b>                 | 635.1                           | 469.0                           | <b>166.1</b>                 |
| Diagnostic <sub>8</sub>   | model prop.                          | model pre                | prop./prop.               | 253          | 250.6                           | 183.9                           | <b>66.7</b>                  | 513.5                           | 457.7                           | <b>55.8</b>                  |
| Diagnostic <sub>9</sub>   | model post                           | model pre                | post/post                 | 253          | 340.9                           | 159.3                           | <b>181.5</b>                 | 622.7                           | 467.9                           | <b>154.8</b>                 |
| “pre-calving”<br>Inverse  | FT pre<br>(output:<br>model pre)     | (output:<br>model pre)   | pre/pre                   | 260          | 394.8                           | 157.8                           | <b>237.0</b>                 | 633.2                           | 495.8                           | <b>137.4</b>                 |
| “propagation”<br>Inverse  | FT prop.<br>(output:<br>model prop.) | (output:<br>model prop.) | prop./prop.               | 260          | 226.2                           | 175.6                           | <b>50.6</b>                  | 504.0                           | 475.7                           | <b>28.3</b>                  |
| “post-calving”<br>Inverse | FT post<br>(output:<br>model post)   | (output:<br>model post)  | post/post                 | 260          | 326.2                           | 193.0                           | <b>133.3</b>                 | 603.1                           | 524.8                           | <b>78.3</b>                  |
| Diagnostic <sub>1</sub>   | model pre                            | model pre                | pre/pre                   | 260          | 425.6                           | 177.6                           | <b>248.5</b>                 | 634.9                           | 500.9                           | <b>134.0</b>                 |
| Diagnostic <sub>2</sub>   | model pre                            | model pre                | prop./pre                 | 260          | 415.3                           | 180.6                           | <b>234.7</b>                 | 625.1                           | 506.6                           | <b>118.5</b>                 |
| Diagnostic <sub>3</sub>   | model pre                            | model pre                | post/pre                  | 260          | 514.1                           | 184.6                           | <b>329.5</b>                 | 642.9                           | 520.3                           | <b>122.6</b>                 |
| Diagnostic <sub>4</sub>   | model pre                            | model pre                | prop./prop.               | 260          | 351.9                           | 182.1                           | <b>169.7</b>                 | 628.5                           | 509.5                           | <b>119.0</b>                 |
| Diagnostic <sub>5</sub>   | model pre                            | model pre                | post/post                 | 260          | 335.7                           | 176.7                           | <b>159.0</b>                 | 638.0                           | 500.5                           | <b>137.5</b>                 |
| Diagnostic <sub>6</sub>   | model prop.                          | model pre                | prop./pre                 | 260          | 199.8                           | 181.0                           | <b>18.8</b>                  | 495.6                           | 496.4                           | <b>-0.8</b>                  |
| Diagnostic <sub>7</sub>   | model post                           | model pre                | post/pre                  | 260          | 324.8                           | 162.2                           | <b>162.7</b>                 | 615.4                           | 514.7                           | <b>100.7</b>                 |
| Diagnostic <sub>8</sub>   | model prop.                          | model pre                | prop./prop.               | 260          | 182.5                           | 187.9                           | <b>-5.4</b>                  | 494.6                           | 502.0                           | <b>-7.4</b>                  |
| Diagnostic <sub>9</sub>   | model post                           | model pre                | post/post                 | 260          | 251.9                           | 160.7                           | <b>91.2</b>                  | 604.6                           | 503.7                           | <b>100.9</b>                 |

## References

- Andersen, O. B. and Knudsen, P.: The DNSC08 mean sea surface and mean dynamic topography, *Journal of Geophysical Research*, p. C11, <https://doi.org/10.1029/2008JC005179>, 2009.
- British Antarctic Survey Press Office: Brunt Ice Shelf in Antarctica calves giant iceberg, <https://www.bas.ac.uk/media-post/brunt-ice-shelf-in-antarctica-calves-giant-iceberg/>, accessed: 2023-03-01, 2023.
- De Rydt, J., Gudmundsson, G. H., Nagler, T., Wuite, J., and King, E. C.: Recent rift formation and impact on the structural integrity of the Brunt Ice Shelf, East Antarctica, *The Cryosphere*, 12, 505–520, <https://doi.org/10.5194/tc-12-505-2018>, 2018.
- Gardner, A. S., Moholdt, G., Scambos, T., Fahnestock, M., Ligtenberg, S., van den Broeke, M., and Nilsson, J.: Increased West Antarctic and unchanged East Antarctic ice discharge over the last 7 years, *The Cryosphere*, 12, 521–547, <https://doi.org/10.5194/tc-12-521-2018>, 2018.
- Gardner, A. S., Fahnestock, M., and Scambos, T.: ITS\_LIVE Regional Glacier and Ice Sheet Surface Velocities, Data archived at National Snow and Ice Data Center, <https://doi.org/10.5067/6II6VW8LLWJ7>, 2020.
- Glen, J. W.: The creep of polycrystalline ice, *Proceedings of the Royal Society of London. Series A. Mathematical and Physical Sciences*, 228, 519–538, <https://doi.org/10.1098/rspa.1955.0066>, 1955.
- King, E. C., De Rydt, J., and Gudmundsson, G. H.: The internal structure of the Brunt Ice Shelf from ice-penetrating radar analysis and implications for ice shelf fracture, *The Cryosphere*, 12, 3361–3372, <https://doi.org/10.5194/tc-12-3361-2018>, 2018.
- Marsh, O. J., Luckman, A. J., and Hodgson, D. A.: Brief communication: Rapid acceleration of the Brunt Ice Shelf after calving of iceberg A-81, *The Cryosphere*, 18, 705–710, <https://doi.org/10.5194/tc-18-705-2024>, 2024.
- Morlighem, M.: MEaSURES BedMachine Antarctica, Version 2. [floating ice mask, firn air content], Boulder, Colorado USA. NASA National Snow and Ice Data Center Distributed Active Archive Center, <https://doi.org/10.5067/E1QL9HFQ7A8M>, date Accessed: 2021, 2020.
- Pavlis, N. K., Holmes, S. A., Kenyon, S. C., and Factor, J. K.: The development and evaluation of the Earth Gravitational Model 2008 (EGM2008), *Journal of Geophysical Research: Solid Earth*, 117, <https://doi.org/10.1029/2011JB008916>, 2012.
- Shapero, D. R., Badgeley, J. A., Hoffman, A. O., and Joughin, I. R.: icepack: A new glacier flow modeling package in Python, version 1.0, *Geoscientific Model Development*, 14, 4593–4616, <https://doi.org/10.5194/gmd-14-4593-2021>, 2021.
- Swinski, J. P., Shean, D., and Sutterley, T.: ICESat2-SlideRule/sliderule-icesat2: v1.4.3, <https://doi.org/10.5281/zenodo.6600555>, 2022.
- U. S. National Ice Center: Iceberg A-81 Calved from the Brunt Ice Shelf in the Weddell Sea, <https://usicecenter.gov/PressRelease/Iceberga81>, accessed: 2023-03-01, 2023.
